# Supplementary material
Source: publisher figshare collection journal article supplement (https://diabetesjournals.figshare.com/articles/dataset/_/25444327)
Supplement: Supplementary file 1 [file 1]

# **Time-to-Event Genome-Wide Association Study for Incident Cardiovascular Disease in People with Type 2 Diabetes Mellitus**

## **SUPPLEMENTARY METHODS**

### **Definition of Type 2 Diabetes and Age at Diagnosis**

T2D was defined in each cohort based on meeting one or more of the American Diabetes Association criteria, and the age at diagnosis was determined through self-report or incident diagnosis during follow-up according to each cohort (1). The details on how age at diagnosis was captured is described in **Table S2**. For many cohorts, self-reported or hospital-recorded age was utilized for prevalent diabetes cases at enrollment. For incident cases, the age was determined at the time of the follow-up visit when diabetes was first reported.

### **Definition of Cardiovascular Disease**

CVD was defined as a composite of 1) coronary artery disease (CAD), 2) cerebrovascular disease, and 3) death from a cardiovascular cause. CAD included myocardial infarction, stable or unstable angina, percutaneous coronary intervention, coronary artery bypass grafting, and other cohort-defined events (**Table S3**). Cerebrovascular disease included ischemic stroke, hemorrhagic stroke, transient ischemic attack, carotid stenting, endarterectomy, and other cohort-defined events. Death from cardiovascular causes included death from myocardial infarction, stroke, unexpected death presumed to be from ischemic CVD, and other cohort-defined events. An incident CVD event was defined as the first CVD event occurring at least one year after T2D diagnosis. Participants with any CVD event prior to diagnosis of T2D or within one year after diagnosis of T2D were excluded from incident CVD analysis. If a participant had multiple CVD events, only the first event was considered.

### **Cox Proportional Hazards Assumption**

Before running the Cox proportional hazards model, the model which did not include genotype information was evaluated to determine whether it met the proportional hazard assumption using the `cox.zph()` function in the 'Survival' R package (2). If a variable violated the assumption, this was resolved either by including an interaction term or by stratifying the variables into 3 to 5 subgroups.

### **Meta-Analysis**

Summary statistics of the cohort level results underwent standard quality control procedures using EasyQC software (3). First, the genetic coordinates of GRCh38 were converted to GRCh37/hg19 using LiftOver (4) software. Then variants with unreliably large effect size ( $\beta \geq 10$ ) or large standard error ( $\geq 10$ ) were excluded in each cohort. Variants with minor allele count  $\leq 6$ , or variants with a frequency difference  $> 0.20$  compared to the corresponding ancestry in the 1,000 Genomes phase 3 data were also removed. Meta-analysis of cohort-level summary statistics was conducted using an inverse-variance-weighted fixed-effect method as implemented in METAL (5). Genomic control was applied at the cohort level to control for possible inflation in the type I error due to residual population stratification. Both overall meta-analysis and ancestry-level meta-analysis were performed. A genome-wide significance threshold was set as  $P < 5.0 \times 10^{-8}$  (6; 7).

### **Approximate Conditional Analysis**

Approximate conditional analysis using summary statistics was carried out using GCTA-Cojo (8) (version 1.93.2). Variants within a 120 kilobase (Kb) region ( $\pm 60$  Kb) of the lead signal from the meta-analysis were selected. Conditional analyses were approximated using ancestry-specific summary statistics, excluding lead variants that only occurred in one ancestry. Linkage disequilibrium was estimated using GCTA by providing the 1000-Genomes reference panel using super populations 'AFR' to represent our African ancestry, 'EUR' to represent our European ancestry, 'EAS' to represent our East Asian ancestry, and the union of 'AMR', 'CEU' and 'YRI' populations to represent our Hispanic ancestry individuals. We applied a multiple testing

threshold at each locus when considering variants for distinct secondary signals by dividing 0.05 by the number of variants in the 120 Kb region.

### **Fine-Mapping of Distinct Association Signals to Identify 95% Credible Sets**

To fine-map distinct association signals, we computed credible sets with 95% confidence. For each variant within +/- 90 Kb of a lead variant with a minor allele count greater than 40, i.e., the most associated variants in a region, we computed ancestry-specific Bayes factors in favor of association using estimated allelic effect sizes and standard errors from each available ancestry-specific meta-analysis. To find the Bayes factor ( $\Lambda_j$ ) for the  $j$ th variant in a particular ancestry, we considered

$$\Lambda_j = \sqrt{\frac{V_j}{V_j + \omega}} \exp \left[ \frac{\omega \beta_j^2}{2V_j(V_j + \omega)} \right]$$

where  $\beta_j$  and  $V_j$  represent the effect estimate and variance, respectively, from the ancestry-specific meta-analysis (9; 10). The constant  $\omega$  describes the prior variance in allelic effects, which we set to 0.0462.

We then calculated the posterior probability that the  $j$ th variant drives the association signal in a particular ancestry ( $\pi_j$ ) using

$$\pi_j = \frac{\Lambda_j}{\sum_{k=1}^n \Lambda_k}$$

where  $n$  denotes the total number of variants within +/- 90 kilobases of the lead variant (9). This was repeated for all variants in each region.

### **Functional Annotations**

A genome-wide map of 18 distinct human umbilical vein endothelial cell (HUVEC) chromatin state annotations was retrieved from the Common Metabolic Diseases Genome Atlas (CMDGA, <https://cmdga.org/>). These chromatin states were characterized from ENCODE (11) ChIP-seq data using ChromHMM (12) v1.18. Each variant in each ancestry-specific credible set was matched to its corresponding chromatin state annotation.

### **Colocalization of GWAS and eQTL**

To estimate the posterior probability of our genome-wide significant variants and eQTL sharing the identical causal variants, we performed a Bayesian colocalization method as implemented in R package 'coloc' (13) ([cran.r-project.org/web/packages/coloc](http://cran.r-project.org/web/packages/coloc)). eQTL data were obtained from the eQTLGen Consortium (14) (31,684 whole blood samples), and GWAS variants were extracted from the summary statistics for variants located within one megabase (Mb) of the lead GWAS variants. We defined the variants as colocalized when the posterior probability of a colocalized signal (PP4) was >0.8 as generally recommended.

### **Phenome-Wide Association Analysis**

The Common Metabolic Disease Knowledge Portal was used to investigate phenome-wide association (<https://hugeamp.org/>). As there were 388 phenotypic traits (some of which are interrelated) included in the portal, the significance threshold was conservatively set as  $P < 1.2 \times 10^{-4}$  ( $0.05/388$ ).

## SUPPLEMENTARY RESULTS

### Downstream Analysis of the Three Loci

An approximate conditional analysis of the three index variants at each of the three regions of interest showed no evidence of secondary signals (**Figure S2**). We performed fine-mapping analysis for each of the three regions to narrow the number of potentially causal variants using credible set analysis in each ancestry (15). We constructed a total of nine ancestry-specific credible sets: four for chromosome 1, one for chromosome 4, and four for chromosome 6 locus. Each credible set accounted for  $\geq 95\%$  of the posterior probability of association with T2D in CVD in its corresponding ancestry-specific analysis. The median credible set size (i.e., number of variants included) for the chromosome 1 locus was 468, with a minimum size of 28 (AFR), and a maximum size of 816 (HIS). Likewise, the median size for the chromosome 6 locus was 637, with a minimum size of 42 (EUR), and a maximum size of 867 (AFR). However, the chromosome 4 credible set only contained 4 variants: rs77142250, rs114281229, rs7677123, and rs77129258. Small credible sets like this are favorable for prioritizing variants for functional follow-up.

Functional interrogation for the three loci included chromatin state annotations from HUVEC cell lines, a system relevant to endothelial function, atherosclerosis, and CVD (**Figure S3**). The chromosome 4 locus contained narrow bands of transcription and enhancer annotations near *HS3ST1* and wider bands dispersed upstream. One of the four variants in the credible set, rs114281229, falls within a region containing an active enhancer annotation. Additionally, rs77129258 resides in a region of weak transcription. Given their proximity, rs114281229 and rs77129258 may affect expression of *HS3ST1*, but further investigation is required to substantiate this. The chromosome 1 and 6 locus did not provide meaningful functional prioritizations.

We used colocalization with expression QTL data from the eQTLGen Consortium to further characterize the three new loci(13). We found chromosome 6 rs335407 to be a significant eQTL for *TIAM2* in peripheral leukocytes  $P = 7.71 \times 10^{-238}$ . *TIAM2* is essential for endothelial barrier and

cell-cell contact maintenance (16). However, posterior probabilities from colocalization analysis did not support rs335407 as causal for both incident CVD and expression of *TIAM2*. Using a phenome-wide association analysis, we surveyed other phenotypes associated with the three novel loci by interrogating the Common Metabolic Disease Knowledge Portal. Metabolic phenotypes nominally ( $P < 0.05$ ) associated included, for chromosome 1 rs147138607, small artery occlusion and stroke; for chromosome 4 rs7714225, sleep with oxyhemoglobin saturation under 90% and BMI; and for chromosome 6 rs335407, BMI and snoring (**Table S9**).

**Table S1. Basic Cohort Information**

| Study Name                                | Short Study Name | Study Location                       | Ethnicity                            | Study Periods  | Study Design                        | Brief Participant Description                                                                                 | Study Reference (PMID)     |
|-------------------------------------------|------------------|--------------------------------------|--------------------------------------|----------------|-------------------------------------|---------------------------------------------------------------------------------------------------------------|----------------------------|
| Atherosclerosis Risk in Communities Study | ARIC             | NC, MS, MN, MD, USA                  | European, African American           | 1987 - 2014    | Population based prospective cohort | Population based cohort to determine the trends in hospitalized heart attack and coronary heart disease death | 2646917                    |
| BioMe BioBank                             | BIOME            | NY, USA                              | African American, European, Hispanic | 2007 - Current | Hospital based cohort               | Participants from Mountain Sinai Health System                                                                | 33861964                   |
| Cardiovascular Health Study               | CHS              | CA, MD, NC, PA, USA                  | African American, European           | 1989 - Current | Population based prospective cohort | Population based cohort of older adults                                                                       | 1669507                    |
| Framingham Heart Study                    | FHS              | Framingham, MA, USA                  | European                             | 1971 - 2014    | Population based prospective cohort | Original cohort participants from the town of Framingham, MA                                                  | 14819398, 474565, 17372189 |
| Jackson Heart Study                       | JHS              | Jackson, MS, USA                     | African American                     | 2000 - Current | Population based prospective cohort | Population based cohort to investigate CVD risk in African Americans                                          | 16320381                   |
| Korean Genome and Epidemiology Study      | KOGES            | Ansung, and Ansan, Republic of Korea | East Asian                           | 2001 - Current | Population based prospective cohort | Population based cohort to investigate genetic and clinical risk factors of common complex                    | 26577716                   |

|                                                               |         |                                       |                                                  |                |                                     |                                                                                                                                                                        |          |
|---------------------------------------------------------------|---------|---------------------------------------|--------------------------------------------------|----------------|-------------------------------------|------------------------------------------------------------------------------------------------------------------------------------------------------------------------|----------|
|                                                               |         |                                       |                                                  |                |                                     | disease in Korean population with biannual prospective follow-up                                                                                                       |          |
| Multi-Ethnic Study of Atherosclerosis                         | MESA    | USA                                   | African American, East Asian, European, Hispanic | 2001 - Current | Population based prospective cohort | MESA researchers study a diverse, population-based sample of 6,814 asymptomatic men and women aged 45-84.                                                              | 12397006 |
| Mass General Brigham                                          | MGB     | Boston, MA, USA                       | European                                         | 2010 - Current | Hospital based cohort               | Patients of Partners HealthCare                                                                                                                                        | 26784234 |
| Penn Medicine BioBank                                         | PMBB    | Philadelphia, PA, USA                 | African American, European                       | 2013 - Current | Hospital based cohort               | Participants from the Univeristy of Pennsylvania Health System                                                                                                         | 32919613 |
| Prospective Study of Pravastatin in the Elderly at Risk       | PROSPER | Scotland, Ireland and the Netherlands | European                                         | 1997 - 2002    | Randomized controlled trial         | Particpants at cardiovascular risk                                                                                                                                     | 12457784 |
| Reasons for Geographic and Racial Differences in Stroke Study | REGARDS | USA                                   | African American; European                       | 2003 - Current | Population based prospective cohort | REGARDS was designed to investigate factors associated with the excess stroke mortality of residents of the stroke belt region and that of blacks compared with whites | 15990444 |



|                 |           |                            |               |                |                                     |                                                                                                                                                                                                                                                                                           |          |
|-----------------|-----------|----------------------------|---------------|----------------|-------------------------------------|-------------------------------------------------------------------------------------------------------------------------------------------------------------------------------------------------------------------------------------------------------------------------------------------|----------|
| Rotterdam Study | ROTTERDAM | Rotterdam, the Netherlands | European      | 1996 - 2012    | Population based prospective cohort | The Rotterdam Study is an ongoing prospective cohort study that started in 1990 in the city of Rotterdam, The Netherlands. The study aims to unravel etiology, preclinical course, natural history and potential targets for intervention for chronic diseases in mid-life and late-life. | 32367290 |
| Sanford Health  | SANFORD   | Upper Midwest, USA         | European      | 1950 - Current | Hospital based cohort (Biobank)     | Patients of Sanford Health System                                                                                                                                                                                                                                                         |          |
| UK Biobank      | UKBB      | UK                         | European only | 2006 - Current | Population based prospective cohort | UK Biobank is a major health resource with the aim of improving the prevention, diagnosis and treatment of a wide range of serious and life-threatening illnesses – including cancer, heart diseases, stroke, diabetes, and etc.                                                          | 30305743 |

|                             |      |                                 |                                                  |                                     |                                             |                                                                              |                    |
|-----------------------------|------|---------------------------------|--------------------------------------------------|-------------------------------------|---------------------------------------------|------------------------------------------------------------------------------|--------------------|
| Women's Genome Health Study | WGHS | N. America (almost entirely US) | European only                                    | 1992 - Current (endpoint data 2017) | Population based prospective cohort         | Female healthcare professionals > 45 at baseline with no known CVD or cancer | 18070814, 15753114 |
| Women's Health Initiative   | WHI  | Seattle, WA                     | African American, East Asian, European, Hispanic | 1992 - Current                      | Population based cohort and clinical trials | Post-menopausal women (age 50-79 at baseline)                                | 9492970            |

| Table S2. Definition of Type 2 Diabetes |                                                                                                                                                  |                                                                                                                                                                                                                        |                                                                                                                                                                                    |
|-----------------------------------------|--------------------------------------------------------------------------------------------------------------------------------------------------|------------------------------------------------------------------------------------------------------------------------------------------------------------------------------------------------------------------------|------------------------------------------------------------------------------------------------------------------------------------------------------------------------------------|
| Short Study Name                        | Diagnosis of Type 2 Diabetes                                                                                                                     | Exclusion Criteria                                                                                                                                                                                                     | Ascertainment of Age at Diagnosis of Diabetes                                                                                                                                      |
| ARIC                                    | Self-reported diagnosis of diabetes by a physician or self-reported use of anti-diabetic medication                                              | Prior coronary heart disease or stroke diagnosis; age at diagnosis of diabetes < 40 years; race/ethnicity not reported as black or white; follow-up time < 1 year; CVD diagnosed < 1 year after diabetes ascertainment | For prevalent diabetes cases at enrollment, age at baseline was used. For incident cases, age was taken at the time of the interview when a diabetes diagnosis was first reported. |
| BIOME                                   | Self-reported diagnosis of diabetes by a physician or self-reported use of anti-diabetic medication                                              | Age at DM diagnosis below 40 years, CVD diagnosed at < 1 year after the DM diagnosis                                                                                                                                   | For prevalent diabetes cases at enrollment, age at baseline was used. For incident cases, age was taken at the time of the interview when a diabetes diagnosis was first reported. |
| CHS                                     | Fasting glucose $\geq$ 126 mg/dL or non-fasting glucose $\geq$ 200 mg/dL or use of insulin or an oral hypoglycemic agent.                        | All participants were age 65 or older at baseline and no information was available regarding age at diagnosis of diabetes. Thus, no participants with diabetes were excluded.                                          | For prevalent type 2 diabetes cases, population mean was used from PMID:15671192 . For incident cases, age at follow-up visit that was closest to the date of diagnosis was used.  |
| FHS                                     | Fasting glucose $\geq$ 126 mg/dL or use of insulin or an oral hypoglycemic agent or 2hour glucose $\geq$ 200 mg/dL or Hba1c $\geq$ 6.5%          | Age at DM diagnosis below 40 years, CVD diagnosed at < 1 year after the DM diagnosis                                                                                                                                   | For prevalent type 2 diabetes cases, self reported age at diagnosis was used. For incident cases, age at follow-up visit that was closest to the date of diagnosis was used.       |
| JHS                                     | Fasting glucose $\geq$ 126 mg/dL or use of insulin or an oral hypoglycemic agent or 2hour glucose $\geq$ 200 mg/dL or Hba1c $\geq$ 6.5%          | Type 1 diabetes, age at diagnosis of diabetes below 40 years, CVD diagnosed at < 1 year after the DM diagnosis                                                                                                         | For prevalent type 2 diabetes cases, self reported age at diagnosis was used. For incident cases, age at follow-up visit that was closest to the date of diagnosis was used.       |
| KOGES                                   | Fasting glucose $\geq$ 126 mg/dL, or 75g OGTT 2-h glucose $\geq$ 200 mg/dL, or confirmed by health care provider, or on anti-diabetic medication | Type 1 diabetes, gestational diabetes, age at diagnosis of diabetes below 40 years                                                                                                                                     | For prevalent type 2 diabetes cases, self reported age at diagnosis was used. For incident cases, age at follow-up visit that was closest to the date of diagnosis was used.       |

|           |                                                                                                                                                                                                                                                                                                                             |                                                                                                                                                                                     |                                                                                                                                                                              |
|-----------|-----------------------------------------------------------------------------------------------------------------------------------------------------------------------------------------------------------------------------------------------------------------------------------------------------------------------------|-------------------------------------------------------------------------------------------------------------------------------------------------------------------------------------|------------------------------------------------------------------------------------------------------------------------------------------------------------------------------|
| MESA      | Fasting glucose $\geq$ 126 mg/dL or confirmed by health care provider or on anti-diabetic medication                                                                                                                                                                                                                        | Type 1 diabetes, age at diagnosis of diabetes below 40 years, CVD diagnosed at < 1 year after the DM diagnosis                                                                      | For prevalent type 2 diabetes cases, self reported age at diagnosis was used. For incident cases, age at follow-up visit that was closest to the date of diagnosis was used. |
| MGB       | Fasting glucose $\geq$ 126 mg/dL, or 75g OGTT 2-h glucose $\geq$ 200 mg/dL, or confirmed by health care provider, or on anti-diabetic medication                                                                                                                                                                            | Type 1 diabetes, gestational diabetes, age at diagnosis of diabetes below 40 years                                                                                                  | For prevalent type 2 diabetes cases, self reported age at diagnosis was used. For incident cases, age at follow-up visit that was closest to the date of diagnosis was used. |
| PMBB      | (2 or more T2DM Dx codes AND T2DM RX) OR (2 or more T2DM DX codes AND (Random glucose > 200 OR Fasting Glucose > 125 OR any A1c $\geq$ 6.5)) OR (T2DM RX AND (Random glucose > 200 OR Fasting Glucose > 125 OR any A1c $\geq$ 6.5)) Internal OR 2 separate: Random glucose > 200 OR Fasting Glucose > 125 OR A1C $\geq$ 6.5 | Age at DM diagnosis below 40 years, CVD diagnosed at < 1 year after the DM diagnosis                                                                                                | Age at first diabetes diagnosis                                                                                                                                              |
| PROSPER   | Known diabetes mellitus or fasting blood glucose $\geq$ 7 mmol/L                                                                                                                                                                                                                                                            | Recent stroke, transient ischemic attack, myocardial infarction, arterial surgery, or amputation for vascular disease #6months before study entry; glucose concentration>15 mmol/L  | Age at start of the study is used as age at diagnosis of diabetes                                                                                                            |
| REGARDS   | Fasting glucose $\geq$ 126 mg/dL or non-fasting glucose $\geq$ 200 mg/dL or self-reported use of insulin or an oral hypoglycemic agent                                                                                                                                                                                      | All participants were age 45 or older at baseline and no information was available regarding age at diagnosis of diabetes. We did not exclude any participants with diabetes.       | Age at the start of study (age at computer-assisted telephone interview)                                                                                                     |
| ROTTERDAM | Fasting blood glucose concentration of 7.0 mmol/l or higher, or the use of blood glucose-lowering medications                                                                                                                                                                                                               | At baseline, RS has no data on age at diabetes diagnosis, therefore our cases are T2D over the follow-up, are older than 45 years. CVD diagnosed at < 1 year after the DM diagnosis | Age at diagnosis is available for all incident cases.                                                                                                                        |
| SANFORD   | Diagnosis of type 2 diabetes based on hospital record                                                                                                                                                                                                                                                                       | Type 1 diabetes, diagnosis of T2D at age < 40                                                                                                                                       | Age at diagnosis is available for all incident cases.                                                                                                                        |

|      |                                                                                                                                                                                                                     |                                                                                                         |                                                      |
|------|---------------------------------------------------------------------------------------------------------------------------------------------------------------------------------------------------------------------|---------------------------------------------------------------------------------------------------------|------------------------------------------------------|
| UKBB | Fasting glucose $\geq$ 126 mg/dL, or Hba1c $\geq$ 6.5%, or confirmed by health care provider, or on anti-diabetic medication                                                                                        | Type 1 diabetes, gestational diabetes, age at diagnosis of diabetes below 40 years                      | Self reported age at diagnosis of diabetes was used. |
| WGHS | At least one of the following: symptom of hyperglycemia, 2 or more measures of elevated plasma glucose, or use of insulin or an oral hypoglycemic agent by self-report with follow-up in medical records as needed. | Diabetes < 30 years                                                                                     | Self reported age at diagnosis of diabetes was used. |
| WHI  | Self-reported diagnosis of diabetes by a physician or self-reported use of anti-diabetic medication                                                                                                                 | All subjects were older than 40 years old at baseline, CVD diagnosed at < 1 year after the DM diagnosis | Self reported age at diagnosis of diabetes was used. |

**Table S3. Definition of CVD Event**

| Short Study Name | Definition of CVD event                                                                                               |                                                                                   |                                                                                                                  | Source of CVD Event Information                                               |
|------------------|-----------------------------------------------------------------------------------------------------------------------|-----------------------------------------------------------------------------------|------------------------------------------------------------------------------------------------------------------|-------------------------------------------------------------------------------|
|                  | Coronary Artery Disease                                                                                               | Cerebrovascular Disease                                                           | Death from Cardiovascular Cause                                                                                  |                                                                               |
| ARIC             | Hospitalized myocardial infarction, percutaneous coronary intervention, or coronary artery bypass graft               | Definite, probable, or possible hospitalized stroke                               | Fatal coronary heart disease or stroke                                                                           | Adjudicated events data                                                       |
| BIOME            | Hospitalized myocardial infarction, percutaneous coronary intervention, or coronary artery bypass graft               | Definite, probable, or possible hospitalized stroke                               | Fatal coronary heart disease or stroke                                                                           | Adjudicated events data                                                       |
| CHS              | Fatal or non-fatal myocardial infarction, angina, percutaneous coronary intervention, or coronary artery bypass graft | Fatal or non-fatal stroke (ischemic or hemorrhagic), or transient ischemic attack | Fatal myocardial infarction or fatal stroke                                                                      | Adjudicated events data                                                       |
| FHS              | Fatal or non-fatal myocardial infarction, angina, percutaneous coronary intervention, or coronary artery bypass graft | Fatal or non-fatal stroke (ischemic or hemorrhagic), or transient ischemic attack | Fatal myocardial infarction or fatal stroke                                                                      | Adjudicated events data                                                       |
| JHS              | Fatal or non-fatal MI, Coronary revascularization procedure, or death from CHD.                                       | Stroke or angioplasty of arteries of neck                                         | Fatal coronary heart disease or stroke                                                                           | Adjudicated events data                                                       |
| KOGES            | Myocardial infarction                                                                                                 | Stroke                                                                            | Death from myocardial infarction or stroke. Unexpected death presumed to be from ischemic cardiovascular disease | Self-report and death record registry from Korea National Statistical Office. |

|         |                                                                                                                                                     |        |                                                                                    |                                                                                                                                                                                                                                                                                                                                                                                                                                                                                                                                                                                                                                       |
|---------|-----------------------------------------------------------------------------------------------------------------------------------------------------|--------|------------------------------------------------------------------------------------|---------------------------------------------------------------------------------------------------------------------------------------------------------------------------------------------------------------------------------------------------------------------------------------------------------------------------------------------------------------------------------------------------------------------------------------------------------------------------------------------------------------------------------------------------------------------------------------------------------------------------------------|
| MESA    | Myocardial infarction, resuscitated cardiac arrest, definite angina, probable angina (if followed by revascularization)                             | Stroke | Stroke Death<br>CHD Death<br>Other Atherosclerotic Death<br>Other CVD Death        | a telephone interviewer contacted each participant to inquire about all interim hospital admissions, cardiovascular outpatient diagnoses and procedures, and deaths. In addition, MESA occasionally identified additional medical encounters through cohort clinic visits, participant call-ins, medical record abstractions or obituaries. In order to verify self-reported diagnoses, we requested copies of all death certificates and medical records for all hospitalizations and selected outpatient cardiovascular diagnoses and procedures. We also obtained next of kin interviews for out of hospital cardiovascular deaths |
| PBB     | Myocardial infarction                                                                                                                               | Stroke | Death from myocardial infarction or stroke                                         | Hospital based electronic health record                                                                                                                                                                                                                                                                                                                                                                                                                                                                                                                                                                                               |
| PMBB    | Myocardial infarction, chronic ischemic heart disease, Other acute and subacute forms of ischemic heart disease                                     | Stroke | Death from CAD or CVD as assigned by medical records and the National death index. | Hospital based electronic health record and National Death Index data                                                                                                                                                                                                                                                                                                                                                                                                                                                                                                                                                                 |
| PROSPER | Incident CHD defined as fatal or non-fatal myocardial infarction, surgical or percutaneous coronary revascularization procedure, or death from CHD. | Stroke | Death from myocardial infarction or stroke                                         | Adjudicated events data                                                                                                                                                                                                                                                                                                                                                                                                                                                                                                                                                                                                               |

|           |                                                                                                                                                                              |                                                                   |                                                                                                                                                                                                                         |                                                                                             |
|-----------|------------------------------------------------------------------------------------------------------------------------------------------------------------------------------|-------------------------------------------------------------------|-------------------------------------------------------------------------------------------------------------------------------------------------------------------------------------------------------------------------|---------------------------------------------------------------------------------------------|
| REGARDS   | Total CHD including revascularization: first event of definite/probable myocardial infarction OR revascularization OR definite/probable acute CHD death on/before 12/31/2016 | Incident stroke (ischemic or hemorrhagic) on or before 09/30/2019 | CVD death from definite, probable, or possible MI, heart failure, other cardiac death, or not cardiac but other CVD death on/before 12/31/2016, or probable stroke death identified using National Death Index registry | Adjudicated events data                                                                     |
| ROTTERDAM | Incident CHD defined as fatal or non-fatal myocardial infarction, surgical or percutaneous coronary revascularization procedure, or death from CHD.                          | Stroke                                                            | Death from any CVD (CHD, heart failure, stroke)                                                                                                                                                                         | Outpatient clinic reports, hospital discharge letters, electrocardiograms, and imaging data |
| SANFORD   | Hospitalized myocardial infarction, percutaneous coronary intervention, or coronary artery bypass graft                                                                      | Stroke                                                            | Fatal coronary heart disease or stroke                                                                                                                                                                                  | Adjudicated events data                                                                     |
| UKBB      | Myocardial infarction                                                                                                                                                        | Stroke                                                            | N/A                                                                                                                                                                                                                     | Self-report                                                                                 |
| WGHS      | Incident myocardial infarction                                                                                                                                               | Incident stroke                                                   | Death from any CVD (CHD, heart failure, stroke) from autopsy reports, death certificates, medical records, and information obtained from family members                                                                 | Self-report followed by physician review of medical records using WHO standard              |
| WHI       | Incident CHD defined as fatal or non-fatal MI, Coronary revascularization procedure, or death from CHD.                                                                      | Stroke                                                            | Death from definite or probable CHD or stroke                                                                                                                                                                           | Adjudicated events data                                                                     |



**Table S4. Time-to-Event GWAS Analysis Software Used**

| <b>Short Study Name</b> | <b>Analysis Software Used</b>               |
|-------------------------|---------------------------------------------|
| ARIC                    | michiganCoxSurv in gwasurvivr version 3.10  |
| BIOME                   | impute2CoxSurv in gwasurvivr                |
| CHS                     | GWASTools_1.28.0                            |
| FHS                     | assoCoxPH in GWASTools version 1.33.0       |
| JHS                     | assoCoxPH in GWASTools version 1.33.0       |
| KOGES                   | michiganCoxSurv in gwasurvivr version 3.10  |
| MESA                    | michiganCoxSurv in gwassurvivr version 3.10 |
| PBB                     | michiganCoxSurv in gwasurvivr version 3.10  |
| PMBB                    | plinkCoxSurv in gwassurvivr version 3.10    |
| PROSPER                 | michiganCoxSurv in gwassurvivr version 3.10 |
| REGARDS                 | plinkCoxSurv in gwassurvivr version 3.10    |
| ROTTERDAM               | michiganCoxSurv in gwassurvivr version 3.10 |
| SANFORD                 | michiganCoxSurv in gwasurvivr version 3.10  |
| UKBB                    | assoCoxPH in GWASTools version 1.33.0       |
| WGHS                    | ProbABEL Cox model                          |
| WHI                     | michiganCoxSurv in gwasurvivr version 3.10  |

**Table S5. Genotyping Platform and Imputation**

| Short Study Name | Array (Platform and Version)               | Pre-imputation Variant QC (e.g. Call Rate, HWE, Heterozygosity, MAF)                   | Imputation Method          | Imputation Reference Panel                                           | Measure of Imputation Accuracy | Genome Build |
|------------------|--------------------------------------------|----------------------------------------------------------------------------------------|----------------------------|----------------------------------------------------------------------|--------------------------------|--------------|
| ARIC             | Affymetrix Genome-Wide Human SNP Array 6   | Call Rate > 0.95, HWE $P > 1.0 \times 10^{-6}$ , MAF > 0.01                            | Michigan Imputation Server | 1000G                                                                | INFO                           | GRCh37       |
| BIOME            | Affymetrix Genome-Wide Human SNP Array 6   | Call Rate > 0.95, HWE $P > 1.0 \times 10^{-6}$ , MAF > 0.01                            | Michigan Imputation Server | 1000G                                                                | INFO                           | GRCh37       |
| CHS              | Illumina 370CNV (EA), Illumina Omni1M (AA) | Call rate < 97%, HWE $P < 10^{-5}$ , > 2 duplicate errors or Mendelian inconsistencies | Michigan Imputation Server | TOPMed F5                                                            | R2                             | GRCh38       |
| FHS              | Affymetrix 500K and MIPS 50K               | Call Rate > 0.95, HWE $P > 1.0 \times 10^{-6}$ , MAF > 0.01                            | Michigan Imputation Server | 1000G                                                                | R2                             | GRCh37       |
| JHS              | Affymetrix Genome-Wide Human SNP Array 6   | Call Rate > 0.95, HWE $P > 1.0 \times 10^{-6}$                                         | Michigan Imputation Server | 1000G                                                                | R2                             | GRCh37       |
| KOGES            | Affymetrix Genome-Wide Human SNP Array 5   | Call Rate > 0.95, HWE $P > 1.0 \times 10^{-6}$ , MAF > 0.01                            | Michigan Imputation Server | 1779 Northeast Asian + 1000 Genomes Project phase 3 (PMID: 31640730) | R2                             | GRCh37       |

|           |                                                                                              |                                                                                                         |                                           |             |      |        |
|-----------|----------------------------------------------------------------------------------------------|---------------------------------------------------------------------------------------------------------|-------------------------------------------|-------------|------|--------|
| MESA      | Affymetrix Genome-Wide Human SNP Array 6                                                     | Call Rate > 0.95, HWE $P > 1.0 \times 10^{-6}$                                                          | Michigan Imputation Server                | TOPMed F5   | R2   | GRCh38 |
| PBB       | Illumina Multiethnic Beadchip Array                                                          | Call Rate > 0.95, HWE $P > 1.0 \times 10^{-6}$ , MAF > 0.01                                             | Michigan Imputation Server                | HRC         | R2   | GRCh37 |
| PMBB      | Illumina InfiniumOmniExpress-24v1-2_A1; Global Screening Array V1; Global Screening Array V2 | Sample call rate <98%; HWE < $1 \times 10^{-6}$ ; MAF < 0.01                                            | Michigan Imputation Server                | TopMed F8   | R2   | GrCh38 |
| PROSPER   | Illumina Beadchip 660K                                                                       | Call Rate > 0.97, HWE $P > 1.0 \times 10^{-6}$ , duplicate errors, sex errors                           | Michigan Imputation Server                | HRC         | R2   | GRCh37 |
| REGARDS   | Illumina Infinium Multi-Ethnic Genotype Array (MEGA Chip)                                    | Call Rate > 0.90, HWE $P > 1.0 \times 10^{-5}$ for EU, HWE $P > 1.0 \times 10^{-12}$ for AA, MAF > 0.05 | BioData Catalyst TOPMed Imputation Server | TOPMed F8   | R2   | GRCh38 |
| ROTTERDAM | Illumina 550 K and 610 K                                                                     | Sample call rate <98%; HWE < $1 \times 10^{-6}$ ; MAF < 0.01                                            | MaCH/minimac                              | HRC         | INFO | GRCh38 |
| SANFORD   | GSA Version 1                                                                                | Call Rate > 0.95, HWE $P > 1.0 \times 10^{-6}$                                                          | Michigan Imputation Server                | TOPMed F8   | R2   | GRCh37 |
| UKBB      | Affymetrix Axiom UK Biobank Genotyping Array                                                 | Call Rate > 0.98, HWE $P > 1.0 \times 10^{-6}$ , MAF > 0.01, Het < mean $\pm 3$ xs.d.                   | IMPUTE2                                   | HRC + UK10K | INFO | GRCh37 |
| WGHS      | Illumina HumanHap300 Duo "+"                                                                 | Call rate > 0.90, HWE $P > 1.0 \times 10^{-6}$                                                          | Michigan Imputation Server                | 1000G       | R2   | GRCh37 |

|           |                                                                                                                                                                                                                                                                       |                                                                |                                                 |           |    |        |
|-----------|-----------------------------------------------------------------------------------------------------------------------------------------------------------------------------------------------------------------------------------------------------------------------|----------------------------------------------------------------|-------------------------------------------------|-----------|----|--------|
| WHI-HIPFX | Illumina 550 K and 610 K;<br>Affymatrix 6.0; Illumina<br>humanOmni1-Quad v1-0 B;<br>Illumina<br>HumanOmniEspressExome-<br>8v1_B; CytoSNP 370k;<br>Affymetrix Gene Titan, Axiom<br>Genome-Wide Human CEU I<br>Array Plate; Multi-Ethnic<br>Genotyping Array; OncoArray | Call rate > 0.98, HWE P<br>> $1.0 \times 10^{-4}$ , MAF > 0.01 | BioData Catalyst<br>TOPMed<br>Imputation Server | TOPMed F8 | R2 | GRCh38 |
|-----------|-----------------------------------------------------------------------------------------------------------------------------------------------------------------------------------------------------------------------------------------------------------------------|----------------------------------------------------------------|-------------------------------------------------|-----------|----|--------|

**Table S6. Sample Size and Event Rate According to Ancestry and Cohort**

| Ancestry                   | Cohort    | Total (N)      | Event (N)     | Event Rate (%) |
|----------------------------|-----------|----------------|---------------|----------------|
| European/European American | ARIC      | 2,184          | 543           | 24.9           |
|                            | BIOME     | 851            | 160           | 18.8           |
|                            | CHS       | 379            | 225           | 59.4           |
|                            | FHS       | 547            | 185           | 33.8           |
|                            | MESA      | 392            | 64            | 16.3           |
|                            | MGB       | 1,161          | 389           | 33.5           |
|                            | PMBB      | 603            | 244           | 40.5           |
|                            | PROSPER   | 452            | 39            | 8.6            |
|                            | REGARDS   | 303            | 195           | 64.4           |
|                            | ROTTERDAM | 611            | 98            | 16             |
|                            | SANFORD   | 2,062          | 174           | 8.4            |
|                            | UKBB      | 15,643         | 1,499         | 9.6            |
|                            | WGHS      | 2,043          | 105           | 5.1            |
|                            | WHI       | 3,887          | 998           | 25.7           |
| Subtotal                   |           | 31,118 (63.2%) | 4,918 (54.9%) | 15.8           |
| African American           | ARIC      | 1,142          | 310           | 27.1           |
|                            | BIOME     | 1,764          | 467           | 26.5           |
|                            | CHS       | 130            | 76            | 58.5           |
|                            | JHS       | 726            | 92            | 12.7           |
|                            | MESA      | 508            | 85            | 16.7           |
|                            | PMBB      | 1,242          | 388           | 31.2           |
|                            | REGARDS   | 2,483          | 733           | 29.5           |
|                            | WHI       | 3,129          | 693           | 22.1           |
| Subtotal                   |           | 11,124 (22.6%) | 2,844 (31.8%) | 25.6           |
| Hispanic/Latino            | BIOME     | 2,681          | 668           | 24.9           |
|                            | MESA      | 482            | 89            | 18.5           |
|                            | WHI       | 1,162          | 177           | 15.2           |
| Subtotal                   |           | 4,325 (8.8%)   | 934 (10.4%)   | 21.6           |
| East Asian                 | KOGES     | 2,317          | 185           | 8.0            |
|                            | MESA      | 194            | 42            | 21.6           |
|                            | WHI       | 152            | 33            | 21.7           |
| Subtotal                   |           | 2,663 (5.4%)   | 260 (2.9%)    | 9.8            |
| Total                      |           | 49,230         | 8,956         | 18.2           |

A total of 49,230 participants with T2D from 16 cohorts and of multiple ancestries were included in this study: 31,118 (63.2%) of European, 11,124 (22.6%) of African American, 4,325 (8.8%) of Hispanic/Latino, and 2,663 (5.4%) of East Asian ancestry. The total incident CVD event rate was 18.2% with those of African ancestry having the highest event rate of 25.6%. ARIC, Atherosclerosis Risk in Communities Study; BIOME, BioMe BioBank; CHS, Cardiovascular

Health Study; FHS, Framingham Heart Study; JHS, Jackson Heart Study; KOGES, Korean Genome and Epidemiology Study; MESA, Multi-Ethnic Study of Atherosclerosis; MGB, Mass General Brigham Biobank ; PMBB, Penn Medicine BioBank; PROSPER, Prospective Study of Pravastatin in the Elderly at Risk; REGARDS, Reasons for Geographic and Racial Differences in Stroke Study; ROTTERDAM, Rotterdam Study; SANFORD, Sanford Health; UKBB, UK Biobank; WGHS, Women's Genome Health Study; and WHI, Women's Health Initiative.

**Table S7. Clinical Characteristics of Each Cohort**

| Short Study Name |                   | N (F/M)          | Mean Age at Diabetes Diagnosis (years) | Mean Observation Time (years) | Mean BMI (kg/m <sup>2</sup> ) | Treatment for High Blood Pressure, N (%) | Current Smoking, N (%) | Mean Systolic Blood Pressure (mmHg) | Mean Total Cholesterol (mg/dl) | Mean HDL Cholesterol (mg/dl) |
|------------------|-------------------|------------------|----------------------------------------|-------------------------------|-------------------------------|------------------------------------------|------------------------|-------------------------------------|--------------------------------|------------------------------|
| ARIC             | Total             | 3326 (1980/1346) | 65.2                                   | 12.3                          | 31.3                          | 821 (57.6)                               | 262 (18.4)             | 129.0                               | 208                            | 46                           |
|                  | with CVD event    | 853 (450/403)    | 62.5                                   | 9.5                           | 31.5                          | 307 (57.1)                               | 115 (21.4)             | 131.9                               | 217                            | 44                           |
|                  | without CVD event | 2473 (1530/943)  | 66.1                                   | 13.2                          | 31.2                          | 514 (57.9)                               | 147 (16.6)             | 127.3                               | 203                            | 47                           |
| BioMe            | Total             | 5983 (3382/2601) | 59.9                                   | 8.4                           | 31.9                          | 5086 (85.0)                              | 649 (11.1)             | 135.0                               | 180                            | 48                           |
|                  | with CVD event    | 1414 (882/532)   | 59.1                                   | 6.0                           | 32.5                          | 1354 (95.8)                              | 136 (9.6)              | 134.1                               | 185                            | 48                           |
|                  | without CVD event | 4569 (2500/2069) | 60.2                                   | 9.2                           | 31.7                          | 3732 (81.7)                              | 513 (11.6)             | 135.2                               | 179                            | 48                           |
| CHS EU T2D       | Total             | 379 (191/188)    | 53.2                                   | 28.3                          | 28.3                          | 182 (48.0)                               | 42 (11.1)              | 140.7                               | 206                            | 47                           |
|                  | with CVD event    | 225 (105/120)    | 53.2                                   | 26.6                          | 28.2                          | 116 (51.6)                               | 26 (11.5)              | 142.5                               | 208                            | 47                           |
|                  | without CVD event | 154 (86/68)      | 53.2                                   | 30.9                          | 28.4                          | 66 (42.9)                                | 16 (10.4)              | 138.0                               | 203                            | 49                           |
| CHS AA T2D       | Total             | 130 (81/49)      | 48.5                                   | 33.7                          | 30.4                          | 74 (56.9)                                | 17 (13.1)              | 144.8                               | 211                            | 52                           |
|                  | with CVD event    | 76 (50/26)       | 48.5                                   | 31.6                          | 30.0                          | 42 (55.2)                                | 6 (7.9)                | 148.8                               | 215                            | 52                           |
|                  | without CVD event | 54 (31/23)       | 48.5                                   | 36.6                          | 30.9                          | 32 (59.3)                                | 11 (20.4)              | 139.2                               | 206                            | 52                           |

|       |                   |                     |      |      |      |            |            |       |     |    |
|-------|-------------------|---------------------|------|------|------|------------|------------|-------|-----|----|
| FHS   | Total             | 762 (314/ 375)      | 57.0 | 13.6 | 31.0 | 270 (35.4) | 159 (20.9) | 134.6 | 208 | 44 |
|       | with CVD event    | 283 (107/145)       | 56.2 | 12.5 | 31.1 | 102 (36.0) | 68 (24.0)  | 138.4 | 216 | 41 |
|       | without CVD event | 479 (207/230)       | 57.5 | 14.3 | 31.0 | 168 (35.1) | 91 (19.0)  | 132.4 | 203 | 46 |
| JHS   | Total             | 726                 | 61.1 | 10.0 | 34.5 | 586 (80.7) | 75 (10.3)  | 130.3 | 198 | 50 |
|       | with CVD event    | 92                  | 62.5 | 6.7  | 33.5 | 74 (80.4)  | 15 (16.3)  | 135.8 | 207 | 49 |
|       | without CVD event | 634                 | 61.0 | 10.5 | 34.7 | 512 (80.8) | 60 (9.5)   | 129.5 | 197 | 50 |
| KOGES | Total             | 2153<br>(1046/1107) | 55.5 | 10.0 | 25.4 | 416 (19.3) | 554 (25.7) | 122.4 | 202 | 44 |
|       | with CVD event    | 185 (82/103)        | 55.0 | 10.7 | 25.7 | 56 (30.2)  | 46 (24.9)  | 126.9 | 203 | 44 |
|       | without CVD event | 1968<br>(964/1004)  | 55.6 | 10.0 | 25.4 | 360 (18.3) | 508 (25.8) | 122.0 | 202 | 44 |
| MESA  | Total             | 1576(798/778)       | 63.1 | 12.3 | 30.5 | 951 (60.4) | 205 (13.0) | 130.5 | 186 | 48 |
|       | with CVD event    | 280(99/181)         | 63.2 | 11.6 | 29.9 | 195 (69.6) | 31 (11.1)  | 136.3 | 186 | 46 |
|       | without CVD event | 1296(699/597)       | 63.1 | 12.5 | 30.6 | 756 (58.4) | 174 (13.5) | 129.2 | 186 | 48 |
| PBB   | Total             | 1161 (524/637)      | 56.7 | 8.6  | 32.4 | 773 (79.2) | 174 (16.1) | 129.4 | 188 | 46 |
|       | with CVD event    | 389 (130/259)       | 58.8 | 6.4  | 32.2 | 270 (85.4) | 63 (17.6)  | 131.1 | 188 | 44 |



|            |                   |                  |      |     |      |             |            |       |     |    |
|------------|-------------------|------------------|------|-----|------|-------------|------------|-------|-----|----|
|            | without CVD event | 772 (394/378)    | 55.7 | 9.7 | 32.5 | 503 (76.2)  | 111 (15.3) | 128.8 | 188 | 48 |
| PMBB       | Total             | 1845 (971/874)   | 57.4 | 7.6 | 33.8 | 110 (6.0)   | NA         | 132.3 | 177 | 46 |
|            | with CVD event    | 632 (304/328)    | 58.3 | 6.3 | 33.3 | 15 (2.4)    | NA         | 134.2 | 176 | 45 |
|            | without CVD event | 1213 (667/546)   | 57.0 | 8.2 | 34.0 | 95 (7.8)    | NA         | 131.3 | 178 | 46 |
| PROSPER    | Total             | 452 (207/245)    | 75.2 | 3.2 | 28.0 | 280 (62)    | 58 (13)    | 158.4 | 193 | 1  |
|            | with CVD event    | 39 (17/22)       | 74.7 | 2.5 | 28.8 | 25 (64)     | 4 (10)     | 156.2 | 193 | 1  |
|            | without CVD event | 413 (190/223)    | 75.2 | 3.2 | 27.9 | 255 (62)    | 54 (13)    | 158.6 | 193 | 1  |
| REGARDS AA | Total             | 2483 (1017/1466) | 64.6 | 8.1 | 32.9 | 1955 (78.7) | 373 (15.0) | 134.2 | 183 | 49 |
|            | with CVD event    | 733 (346/387)    | 66.3 | 5.0 | 32.4 | 601 (85)    | 120 (16.4) | 137.7 | 187 | 48 |
|            | without CVD event | 1750 (671/1079)  | 64.0 | 9.4 | 33.1 | 1354 (80)   | 253 (14.5) | 132.7 | 181 | 49 |
| REGARDS EU | Total             | 303 (183/120)    | 67.7 | 5.2 | 31.3 | 197 (65.0)  | 50 (16.5)  | 129.7 | 179 | 43 |
|            | with CVD event    | 195 (131/64)     | 68.8 | 3.0 | 31.1 | 137 (71.7)  | 37 (19)    | 129.7 | 178 | 42 |
|            | without CVD event | 108 (52/56)      | 65.7 | 9.2 | 31.7 | 60 (57.7)   | 13 (12)    | 129.7 | 180 | 45 |
| ROTTERDAM  | Total             | 611 (356/255)    | 73.0 | 6.5 | 29.0 | 333 (54.5)  | 137 (22.4) | 149.1 | 232 | 1  |

|            |                   |                     |      |      |      |                |             |       |     |    |
|------------|-------------------|---------------------|------|------|------|----------------|-------------|-------|-----|----|
|            | with CVD event    | 98 (52/46)          | 75.2 | 5.1  | 28.5 | 54 (55.1)      | 31 (31.6)   | 153.7 | 232 | 1  |
|            | without CVD event | 513 (304/209)       | 72.6 | 6.7  | 29.1 | 279 (54.4)     | 106 (20.7)  | 148.3 | 193 | 1  |
| SANFORD    | Total             | 61410 (28170/33240) | 63.9 | 5.4  | 37.5 | 30078 (48.98%) | 6537 (12.0) | 129.6 | 153 | 39 |
|            | with CVD event    | 4577 (1838/2739)    | 67.0 | 5.6  | 37.9 | 2220 (48.5%)   | 409 (9.8)   | 131.3 | 159 | 39 |
|            | without CVD event | 56833 (26332/30501) | 63.7 | 5.4  | 37.5 | 27858 (49.02%) | 6128 (12.1) | 129.5 | 153 | 39 |
| UKBB       | Total             | 15643 (5725/9918)   | 54.5 | 7.2  | 31.8 | 10213 (65.3)   | 1634 (10.5) | 142.3 | 173 | 46 |
|            | with CVD event    | 1499 (366/1133)     | 53.1 | 9.5  | 32.2 | 1173 (78.3)    | 228 (15.2)  | 142.6 | 168 | 43 |
|            | without CVD event | 14144 (5359/8785)   | 54.7 | 7.0  | 31.8 | 9040 (63.9)    | 1406 (9.9)  | 142.3 | 173 | 46 |
| WGHS       | Total             | 2470 (2470/0)       | 63.2 | 12.0 | 30.4 | 284 (11.5)     | 284 (11.5)  | 131.1 | 218 | 45 |
|            | with CVD event    | 105 (105/0)         | 65.3 | 7.7  | 30.8 | 33 (31.4)      | 15 (14.3)   | 134.6 | 222 | 43 |
|            | without CVD event | 2365 (2365/0)       | 63.1 | 12.3 | 30.4 | 640 (27.1)     | 269 (11.4)  | 131.0 | 217 | 45 |
| WHI-GARNET | Total             | 1226 (1226/0)       | 69.3 | 10.6 | 32.1 | 58 (5)         | 113 (9)     | 128.3 | 231 | 48 |
|            | with CVD event    | 381 (381/0)         | 69.3 | 7.8  | 31.6 | 10 (3)         | 32 (8)      | 132.1 | 233 | 46 |
|            | without CVD event | 845 (845/0)         | 69.4 | 11.9 | 32.3 | 48 (6)         | 81 (10)     | 126.6 | 230 | 48 |

|            |                   |             |      |      |      |         |         |       |     |    |
|------------|-------------------|-------------|------|------|------|---------|---------|-------|-----|----|
| WHI-GECCO  | Total             | 176 (176/0) | 70.1 | 7.7  | 32.3 | 11 (7)  | 9 (5)   | 129.3 | 236 | 47 |
|            | with CVD event    | 40 (40/0)   | 69.8 | 7.1  | 32.5 | 0 (0)   | 3 (8)   | 132.8 | 234 | 37 |
|            | without CVD event | 136 (136/0) | 70.1 | 7.8  | 32.2 | 11 (8)  | 6 (4)   | 128.3 | 238 | 53 |
| WHI-HIPFX  | Total             | 385 (385/0) | 73.5 | 7.3  | 29.5 | 13 (3)  | 35 (9)  | 131.7 | 220 | 49 |
|            | with CVD event    | 108 (108/0) | 73.8 | 7.5  | 29.2 | 3 (3)   | 8 (7)   | 137.3 | 224 | 47 |
|            | without CVD event | 277 (277/0) | 73.3 | 7.3  | 29.6 | 10 (3)  | 27 (10) | 129.5 | 217 | 50 |
| WHI-LLS    | Total             | 137 (137/0) | 80.1 | 9.8  | 28.7 | 17 (12) | 5 (4)   | 126.5 | 225 | 54 |
|            | with CVD event    | 32 (32/0)   | 76.8 | 8.8  | 29.0 | 2 (6)   | 1 (3)   | 125.0 | 243 | 53 |
|            | without CVD event | 105 (105/0) | 81.1 | 10.1 | 28.6 | 15 (17) | 4 (4)   | 126.9 | 219 | 54 |
| WHI-MOPMAP | Total             | 281 (281/0) | 69.2 | 8.4  | 32.4 | 14 (5)  | 19 (7)  | 127.6 | 224 | 43 |
|            | with CVD event    | 54 (54/0)   | 68.1 | 6.7  | 32.4 | 0 (0)   | 3 (6)   | 128.4 | 213 | 40 |
|            | without CVD event | 227 (227/0) | 69.5 | 8.8  | 32.4 | 14 (5)  | 16 (7)  | 127.4 | 228 | 45 |
| WHI-ONCO   | Total             | 869 (869/0) | 70.4 | 7.3  | 31.0 | 35 (4)  | 49 (6)  | 129.5 | 225 | 50 |
|            | with CVD event    | 168 (168/0) | 70.9 | 7.6  | 30.6 | 5 (3)   | 12 (7)  | 132.3 | 223 | 46 |

|                   |                   |               |      |      |      |        |          |       |     |    |
|-------------------|-------------------|---------------|------|------|------|--------|----------|-------|-----|----|
|                   | without CVD event | 701 (701/0)   | 70.3 | 7.2  | 31.1 | 20 (4) | 37 (5)   | 128.9 | 226 | 52 |
| WHI-WHIMS+        | Total             | 803 (803/0)   | 75.5 | 9.0  | 30.7 | 67 (8) | 43 (5)   | 131.6 | 220 | 51 |
|                   | with CVD event    | 215 (215/0)   | 73.8 | 8.8  | 31.3 | 13 (6) | 12 (6)   | 134.2 | 218 | 48 |
|                   | without CVD event | 588 (588/0)   | 76.1 | 9.1  | 30.5 | 54 (9) | 31 (5)   | 130.7 | 220 | 52 |
| WHI-SHARe         | Total             | 951 (951/0)   | 70.0 | 11.2 | 33.5 | 30 (3) | 105 (11) | 134.2 | 221 | 54 |
|                   | with CVD event    | 241 (241/0)   | 66.5 | 9.3  | 33.8 | 5 (2)  | 38 (16)  | 137.7 | 229 | 50 |
|                   | without CVD event | 710 (710/0)   | 71.2 | 11.9 | 33.4 | 25 (4) | 67 (9)   | 133.0 | 219 | 55 |
| WHI-MEGA AA       | Total             | 2178 (2178/0) | 65.8 | 10.4 | 32.9 | 75 (3) | 269 (12) | 132.8 | 220 | 53 |
|                   | with CVD event    | 452 (452/0)   | 65.5 | 9.0  | 32.8 | 16 (4) | 63 (14)  | 138.0 | 226 | 51 |
|                   | without CVD event | 1726 (1726/0) | 65.8 | 10.8 | 32.9 | 59 (3) | 206 (12) | 131.5 | 219 | 54 |
| WHI-MEGA HA       | Total             | 1162 (1162/0) | 66.3 | 9.6  | 31.4 | 67 (6) | 101 (9)  | 127.6 | 217 | 48 |
|                   | with CVD event    | 177 (177/0)   | 65.9 | 9.3  | 31.9 | 6 (3)  | 10 (6)   | 131.7 | 220 | 47 |
|                   | without CVD event | 985 (985/0)   | 66.4 | 9.6  | 31.3 | 61 (6) | 91 (9)   | 126.9 | 217 | 49 |
| WHI-MEGA Asian/PI | Total             | 152 (152/0)   | 65.1 | 8.2  | 33.2 | 1 (1)  | 17 (11)  | 131.8 | 215 | 47 |

|  |                   |             |      |     |      |       |         |       |     |    |
|--|-------------------|-------------|------|-----|------|-------|---------|-------|-----|----|
|  | with CVD event    | 33 (33/0)   | 65.1 | 9.2 | 34.1 | 0 (0) | 2 (6)   | 133.1 | 228 | 45 |
|  | without CVD event | 119 (119/0) | 65.1 | 7.9 | 33.0 | 1 (1) | 15 (13) | 131.5 | 212 | 47 |

**Table S8. Association of Known 204 CAD Variants in People with T2D**

| rsID        | CHR | Pos<br>(GRCh37) | Nearby Gene           | Effect<br>Allele | Reported<br>Beta in<br>General<br>Population | Reported <i>P</i><br>in General<br>Population | Reported<br>Beta in<br>T2D | Reported<br><i>P</i> in T2D | Consistent Direction<br>of Association |
|-------------|-----|-----------------|-----------------------|------------------|----------------------------------------------|-----------------------------------------------|----------------------------|-----------------------------|----------------------------------------|
| rs36096196  | 1   | 2252205         | <i>MORN1</i>          | T                | 0.047                                        | $1.3 \times 10^{-8}$                          | 0.001                      | 0.9619                      | Yes                                    |
| rs2493298   | 1   | 3325912         | <i>PRDM16</i>         | A                | 0.057                                        | $2.0 \times 10^{-9}$                          | 0.069                      | <b>0.0040</b>               | Yes                                    |
| rs61776719  | 1   | 38461319        | <i>FHL3</i>           | A                | 0.041                                        | $1.2 \times 10^{-9}$                          | 0.007                      | 0.6772                      | Yes                                    |
| rs11206510  | 1   | 55496039        | <i>PCSK9</i>          | T                | 0.058                                        | $3.7 \times 10^{-8}$                          | 0.004                      | 0.8556                      | Yes                                    |
| rs11591147  | 1   | 55505647        | <i>PCSK9</i>          | G                | 0.298                                        | $7.6 \times 10^{-22}$                         | 0.048                      | 0.6048                      | Yes                                    |
| rs17114046  | 1   | 56966350        | <i>PLPP3(PPAP2B)</i>  | A                | 0.115                                        | $1.8 \times 10^{-24}$                         | 0.015                      | 0.5366                      | Yes                                    |
| rs147055617 | 1   | 56986303        | <i>PLPP3(PPAP2B)</i>  | G                | 0.088                                        | $7.8 \times 10^{-14}$                         | 0.07                       | <b>0.0368</b>               | Yes                                    |
| rs112470402 | 1   | 57016950        | <i>PLPP3(PPAP2B)</i>  | TGG              | 0.051                                        | $8.6 \times 10^{-8}$                          | 0.009                      | 0.8772                      | Yes                                    |
| rs602633    | 1   | 109821511       | <i>PSRC1(SORT1)</i>   | G                | 0.112                                        | $2.0 \times 10^{-59}$                         | 0.047                      | <b>0.0133</b>               | Yes                                    |
| rs11806316  | 1   | 115753482       | <i>NGF</i>            | G                | 0.037                                        | $5.0 \times 10^{-10}$                         | 0.002                      | 0.9105                      | Yes                                    |
| rs11810571  | 1   | 151762308       | <i>TDRKH</i>          | G                | 0.055                                        | $1.8 \times 10^{-11}$                         | -0.023                     | 0.2438                      | No                                     |
| rs4845625   | 1   | 154422067       | <i>IL6R</i>           | T                | 0.038                                        | $2.7 \times 10^{-9}$                          | -0.004                     | 0.7971                      | No                                     |
| rs1892094   | 1   | 169094459       | <i>ATP1B1</i>         | C                | 0.041                                        | $4.5 \times 10^{-13}$                         | 0.039                      | <b>0.0241</b>               | Yes                                    |
| rs6700559   | 1   | 200646073       | <i>DDX59,CAMSAP2</i>  | C                | 0.028                                        | $1.8 \times 10^{-8}$                          | 0.007                      | 0.6707                      | Yes                                    |
| rs2820315   | 1   | 201872264       | <i>LMOD1</i>          | T                | 0.036                                        | $1.1 \times 10^{-10}$                         | -0.042                     | <b>0.0417</b>               | No                                     |
| rs60154123  | 1   | 210468999       | <i>HHAT</i>           | T                | 0.044                                        | $2.6 \times 10^{-8}$                          | 0.011                      | 0.6806                      | Yes                                    |
| rs17465637  | 1   | 222823529       | <i>MIA3</i>           | C                | 0.082                                        | $8.5 \times 10^{-31}$                         | 0.052                      | <b>0.0035</b>               | Yes                                    |
| rs699       | 1   | 230845794       | <i>AGT</i>            | G                | 0.036                                        | $2.1 \times 10^{-8}$                          | 0.021                      | 0.2396                      | Yes                                    |
| rs16986953  | 2   | 19942473        | <i>OSR1(AK097927)</i> | A                | 0.097                                        | $1.4 \times 10^{-14}$                         | 0.02                       | 0.4377                      | Yes                                    |
| rs668948    | 2   | 21291529        | <i>APOB</i>           | A                | 0.063                                        | $1.9 \times 10^{-17}$                         | -0.005                     | 0.7979                      | No                                     |
| rs6544713   | 2   | 44073881        | <i>ABCG8,ABCG5</i>    | T                | 0.055                                        | $6.5 \times 10^{-19}$                         | -0.017                     | 0.3667                      | No                                     |
| rs4076834   | 2   | 44081627        | <i>ABCG8,ABCG5</i>    | T                | 0.113                                        | $1.2 \times 10^{-10}$                         | 0.002                      | 0.9411                      | Yes                                    |
| rs582384    | 2   | 45896437        | <i>PRKCE</i>          | A                | 0.033                                        | $7.6 \times 10^{-9}$                          | -0.001                     | 0.9762                      | No                                     |
| rs1561198   | 2   | 85809989        | <i>VAMP8,VAMP5</i>    | T                | 0.059                                        | $1.5 \times 10^{-20}$                         | 0.005                      | 0.7808                      | Yes                                    |
| rs6740731   | 2   | 145270592       | <i>ZEB2,TEX41</i>     | A                | 0.051                                        | $3.9 \times 10^{-9}$                          | 0.007                      | 0.7282                      | Yes                                    |
| rs17678683  | 2   | 145286559       | <i>ZEB2,TEX41</i>     | G                | 0.056                                        | $3.4 \times 10^{-7}$                          | 0.01                       | 0.7563                      | Yes                                    |

|             |   |           |                       |   |       |                       |        |                                        |     |
|-------------|---|-----------|-----------------------|---|-------|-----------------------|--------|----------------------------------------|-----|
| rs2252641   | 2 | 145801461 | <i>ZEB2,TEX41</i>     | C | 0.040 | $7.3 \times 10^{-13}$ | -0.017 | 0.3423                                 | No  |
| rs12999907  | 2 | 164957251 | <i>FIGN</i>           | A | 0.056 | $2.4 \times 10^{-11}$ | -0.001 | 0.9553                                 | No  |
| rs840616    | 2 | 188196469 | <i>CALCRL</i>         | C | 0.040 | $3.0 \times 10^{-9}$  | -0.024 | 0.1617                                 | No  |
| rs115654617 | 2 | 203893999 | <i>WDR12,NBEAL1</i>   | A | 0.118 | $2.1 \times 10^{-32}$ | 0.065  | <b>0.0220</b>                          | Yes |
| rs17517928  | 2 | 216291359 | <i>FN1</i>            | C | 0.048 | $1.8 \times 10^{-10}$ | 0.043  | <b>0.0380</b>                          | Yes |
| rs1250229   | 2 | 216304384 | <i>FN1</i>            | T | 0.064 | $2.5 \times 10^{-19}$ | 0.045  | <b>0.0210</b>                          | Yes |
| rs61741262  | 2 | 218669225 | <i>TNS1</i>           | T | 0.062 | $2.3 \times 10^{-8}$  | 0.048  | 0.1527                                 | Yes |
| rs2571445   | 2 | 218683154 | <i>TNS1</i>           | A | 0.037 | $1.6 \times 10^{-12}$ | 0.029  | 0.1182                                 | Yes |
| rs2972146   | 2 | 227100698 | <i>LOC646736</i>      | T | 0.049 | $1.2 \times 10^{-7}$  | 0.007  | 0.7023                                 | Yes |
| rs1801251   | 2 | 233633460 | <i>KCNJ13,GIGYF2</i>  | A | 0.039 | $5.2 \times 10^{-6}$  | 0.001  | 0.9781                                 | Yes |
| rs11677932  | 2 | 238223955 | <i>COL6A3</i>         | G | 0.034 | $2.6 \times 10^{-8}$  | 0.022  | 0.2675                                 | Yes |
| rs13079221  | 3 | 14901525  | <i>FGD5</i>           | C | 0.041 | $1.6 \times 10^{-10}$ | 0.011  | 0.5114                                 | Yes |
| rs7633770   | 3 | 46688562  | <i>SNORD77,ALS2CL</i> | A | 0.030 | $1.1 \times 10^{-8}$  | 0.045  | <b>0.0106</b>                          | Yes |
| rs7617773   | 3 | 48193515  | <i>CDC25A</i>         | T | 0.039 | $2.4 \times 10^{-11}$ | -0.008 | 0.6407                                 | No  |
| rs7623687   | 3 | 49448566  | <i>RHOA</i>           | A | 0.053 | $1.1 \times 10^{-8}$  | -0.003 | 0.8859                                 | No  |
| rs4678145   | 3 | 124450081 | <i>UMPS,ITGB5</i>     | C | 0.068 | $1.5 \times 10^{-13}$ | 0.056  | <b>0.0378</b>                          | Yes |
| rs10512861  | 3 | 132257961 | <i>DNAJC13</i>        | G | 0.045 | $1.5 \times 10^{-8}$  | -0.044 | <b>0.0388</b>                          | No  |
| rs667920    | 3 | 136069472 | <i>STAG1</i>          | T | 0.049 | $6.1 \times 10^{-15}$ | 0.009  | 0.6388                                 | Yes |
| rs185244    | 3 | 138092889 | <i>MRAS</i>           | T | 0.074 | $3.3 \times 10^{-18}$ | 0.02   | 0.3269                                 | Yes |
| rs12493885  | 3 | 153839866 | <i>ARHGEF26</i>       | C | 0.074 | $1.1 \times 10^{-14}$ | 0.061  | <b>0.0430</b>                          | Yes |
| rs4266144   | 3 | 156852592 | <i>CCNL1</i>          | G | 0.035 | $1.4 \times 10^{-8}$  | 0.002  | 0.9310                                 | Yes |
| rs12897     | 3 | 172115902 | <i>FNDC3B</i>         | G | 0.042 | $1.9 \times 10^{-10}$ | 0.011  | 0.5670                                 | Yes |
| rs16844401  | 4 | 3449652   | <i>HGFAC,RGS12</i>    | A | 0.068 | $4.0 \times 10^{-8}$  | -0.015 | 0.6688                                 | No  |
| rs17087335  | 4 | 57838583  | <i>REST,NOA1</i>      | T | 0.049 | $8.4 \times 10^{-8}$  | -0.007 | 0.7128                                 | No  |
| rs12500824  | 4 | 77416627  | <i>SHROOM3</i>        | A | 0.036 | $4.1 \times 10^{-10}$ | 0.023  | 0.1606                                 | Yes |
| rs10857147  | 4 | 81181072  | <i>FGF5</i>           | T | 0.055 | $1.1 \times 10^{-14}$ | 0.015  | 0.4497                                 | Yes |
| rs11099493  | 4 | 82587050  | <i>HNRNPD</i>         | A | 0.043 | $5.1 \times 10^{-10}$ | 0.006  | 0.7472                                 | Yes |
| rs3775058   | 4 | 96117371  | <i>UNC5C</i>          | A | 0.039 | $7.6 \times 10^{-9}$  | 0.046  | <b>0.0164</b>                          | Yes |
| rs7678555   | 4 | 120909501 | <i>MAD2L1</i>         | C | 0.056 | $3.1 \times 10^{-15}$ | 0.016  | 0.4375                                 | Yes |
| rs35879803  | 4 | 146782837 | <i>ZNF827</i>         | C | 0.033 | $1.2 \times 10^{-6}$  | -0.004 | 0.8179                                 | No  |
| rs4593108   | 4 | 148281001 | <i>EDNRA</i>          | C | 0.063 | $8.1 \times 10^{-15}$ | 0.026  | 0.1790                                 | Yes |
| rs6842241   | 4 | 148400819 | <i>EDNRA</i>          | A | 0.081 | $1.3 \times 10^{-23}$ | 0.067  | <b><math>7.5 \times 10^{-4}</math></b> | Yes |

|             |   |           |                              |   |       |                        |        |                                        |     |
|-------------|---|-----------|------------------------------|---|-------|------------------------|--------|----------------------------------------|-----|
| rs13118820  | 4 | 156436517 | <i>GUCY1A3,MAP9</i>          | A | 0.042 | $1.4 \times 10^{-10}$  | 0.034  | <b>0.0452</b>                          | Yes |
| rs7692387   | 4 | 156635309 | <i>GUCY1A3,MAP9</i>          | G | 0.069 | $4.1 \times 10^{-22}$  | 0.018  | 0.4454                                 | Yes |
| rs7696431   | 4 | 169687725 | <i>PALLD</i>                 | T | 0.035 | $2.7 \times 10^{-8}$   | 0.004  | 0.8328                                 | Yes |
| rs1508798   | 5 | 9556694   | <i>SEMA5A</i>                | T | 0.052 | $4.8 \times 10^{-13}$  | -0.02  | 0.3000                                 | No  |
| rs3936511   | 5 | 55860781  | <i>LOC101928448</i>          | G | 0.037 | $3.7 \times 10^{-8}$   | 0.025  | 0.2302                                 | Yes |
| rs1800449   | 5 | 121413208 | <i>LOX</i>                   | T | 0.044 | $2.0 \times 10^{-7}$   | -0.032 | 0.1508                                 | No  |
| rs273909    | 5 | 131667353 | <i>SLC22A4-SLC22A5</i>       | G | 0.049 | $9.9 \times 10^{-4}$   | 0.05   | 0.0982                                 | Yes |
| rs246600    | 5 | 142516897 | <i>ARHGAP26</i>              | T | 0.048 | $2.1 \times 10^{-17}$  | 0.03   | 0.0731                                 | Yes |
| rs9501744   | 6 | 1617143   | <i>FOXC1</i>                 | C | 0.055 | $2.3 \times 10^{-8}$   | -0.028 | 0.2151                                 | No  |
| rs1412748   | 6 | 12756658  | <i>PHACTR1</i>               | T | 0.052 | $1.3 \times 10^{-8}$   | 0.014  | 0.4616                                 | Yes |
| rs9349379   | 6 | 12903957  | <i>PHACTR1</i>               | G | 0.115 | $4.8 \times 10^{-71}$  | 0.074  | <b><math>3.2 \times 10^{-5}</math></b> | Yes |
| rs7766436   | 6 | 22598259  | <i>HDGFL1</i>                | T | 0.048 | $2.5 \times 10^{-12}$  | 0.03   | 0.0749                                 | Yes |
| rs2072633   | 6 | 31919578  | <i>C2</i>                    | G | 0.041 | $6.3 \times 10^{-13}$  | 0.021  | 0.2010                                 | Yes |
| rs2814993   | 6 | 34618893  | <i>ANKS1A,C6orf16</i>        | A | 0.061 | $9.7 \times 10^{-12}$  | 0.03   | 0.1704                                 | Yes |
| rs17609940  | 6 | 35034800  | <i>ANKS1A,C6orf16</i>        | G | 0.030 | $7.1 \times 10^{-3}$   | -0.029 | 0.2178                                 | No  |
| rs1321309   | 6 | 36638636  | <i>CDKN1A,PANDAR</i>         | A | 0.028 | $3.5 \times 10^{-8}$   | 0.017  | 0.2977                                 | Yes |
| rs10947789  | 6 | 39174922  | <i>KCNK5</i>                 | T | 0.039 | $1.9 \times 10^{-4}$   | 0.043  | <b>0.0414</b>                          | Yes |
| rs6905288   | 6 | 43758873  | <i>VEGFA</i>                 | A | 0.045 | $1.9 \times 10^{-12}$  | 0.025  | 0.1137                                 | Yes |
| rs9367716   | 6 | 57160572  | <i>PRIM2</i>                 | G | 0.038 | $9.6 \times 10^{-10}$  | 0.026  | 0.1214                                 | Yes |
| rs4613862   | 6 | 82612271  | <i>RP11-379B8.1</i>          | A | 0.032 | $6.6 \times 10^{-10}$  | 0.015  | 0.3717                                 | Yes |
| rs1591805   | 6 | 126717064 | <i>CENPW</i>                 | A | 0.041 | $2.1 \times 10^{-10}$  | 0.034  | <b>0.0405</b>                          | Yes |
| rs2327429   | 6 | 134209837 | <i>TCF21</i>                 | T | 0.071 | $8.3 \times 10^{-24}$  | 0.02   | 0.2949                                 | Yes |
| rs2327433   | 6 | 134214227 | <i>TCF21</i>                 | G | 0.076 | $1.0 \times 10^{-8}$   | 0.027  | 0.3324                                 | Yes |
| rs17080091  | 6 | 150997401 | <i>PLEKHG1</i>               | C | 0.054 | $6.1 \times 10^{-9}$   | 0.02   | 0.4371                                 | Yes |
| rs688359    | 6 | 160465291 | <i>IGF2R</i>                 | G | 0.053 | $5.4 \times 10^{-15}$  | 0.026  | 0.1944                                 | Yes |
| rs624249    | 6 | 160679400 | <i>LPA,PLG,LPAL2,SLC22A3</i> | C | 0.058 | $9.1 \times 10^{-11}$  | -0.012 | 0.5011                                 | No  |
| rs2048327   | 6 | 160863532 | <i>LPA,PLG,LPAL2,SLC22A3</i> | C | 0.058 | $7.4 \times 10^{-12}$  | 0.022  | 0.2382                                 | Yes |
| rs147555597 | 6 | 160911596 | <i>LPA,PLG,LPAL2,SLC22A3</i> | A | 0.398 | $2.7 \times 10^{-31}$  | 0.099  | 0.6113                                 | Yes |
| rs55730499  | 6 | 161005610 | <i>LPA,PLG,LPAL2,SLC22A3</i> | T | 0.337 | $3.0 \times 10^{-154}$ | 0.123  | <b><math>6.0 \times 10^{-4}</math></b> | Yes |
| rs9365196   | 6 | 161056112 | <i>LPA,PLG,LPAL2,SLC22A3</i> | C | 0.058 | $8.0 \times 10^{-11}$  | -0.028 | 0.3104                                 | No  |
| rs9457995   | 6 | 161102643 | <i>LPA,PLG,LPAL2,SLC22A3</i> | G | 0.071 | $4.1 \times 10^{-15}$  | 0.042  | <b>0.0379</b>                          | Yes |
| rs186696265 | 6 | 161111700 | <i>LPA,PLG,LPAL2,SLC22A3</i> | T | 0.547 | $4.6 \times 10^{-92}$  | 0.18   | 0.0816                                 | Yes |



|             |    |           |                              |   |       |                        |        |                                        |     |
|-------------|----|-----------|------------------------------|---|-------|------------------------|--------|----------------------------------------|-----|
| rs4252120   | 6  | 161143608 | <i>LPA,PLG,LPAL2,SLC22A3</i> | T | 0.039 | $8.2 \times 10^{-5}$   | 0.02   | 0.2921                                 | Yes |
| rs10267593  | 7  | 1937261   | <i>MAD1L1</i>                | G | 0.036 | $1.9 \times 10^{-8}$   | 0.017  | 0.3871                                 | Yes |
| rs10951983  | 7  | 6446027   | <i>DAGLB</i>                 | A | 0.038 | $1.1 \times 10^{-7}$   | 0.01   | 0.6586                                 | Yes |
| rs11509880  | 7  | 12261911  | <i>TMEM106B</i>              | A | 0.037 | $2.9 \times 10^{-8}$   | -0.026 | 0.1074                                 | No  |
| rs2107595   | 7  | 19049388  | <i>HDAC9</i>                 | A | 0.082 | $3.8 \times 10^{-24}$  | 0.055  | <b>0.0047</b>                          | Yes |
| rs2107732   | 7  | 45077978  | <i>CCM2</i>                  | G | 0.057 | $3.6 \times 10^{-8}$   | 0.084  | <b>0.0166</b>                          | Yes |
| rs10953541  | 7  | 107244545 | <i>7q22(BCAP29)</i>          | C | 0.030 | $5.8 \times 10^{-3}$   | 0.04   | 0.0712                                 | Yes |
| rs975722    | 7  | 117332914 | <i>CFTR,CCTNBP2</i>          | G | 0.028 | $4.2 \times 10^{-8}$   | 0.001  | 0.9426                                 | Yes |
| rs11556924  | 7  | 129663496 | <i>ZC3HC1</i>                | C | 0.058 | $1.9 \times 10^{-18}$  | -0.001 | 0.9727                                 | No  |
| rs10237377  | 7  | 139757136 | <i>PARP12</i>                | G | 0.034 | $6.5 \times 10^{-9}$   | -0.016 | 0.3437                                 | No  |
| rs3918226   | 7  | 150690176 | <i>NOS3</i>                  | T | 0.122 | $3.3 \times 10^{-21}$  | 0.031  | 0.3835                                 | Yes |
| rs6997340   | 8  | 18286997  | <i>NAT2</i>                  | T | 0.036 | $5.0 \times 10^{-9}$   | -0.011 | 0.5533                                 | No  |
| rs6997330   | 8  | 19800529  | <i>LPL</i>                   | C | 0.129 | $7.7 \times 10^{-11}$  | 0      | 0.9908                                 | No  |
| rs15285     | 8  | 19824667  | <i>LPL</i>                   | C | 0.052 | $8.4 \times 10^{-14}$  | 0.005  | 0.7907                                 | Yes |
| rs6984210   | 8  | 22033615  | <i>BMP1</i>                  | G | 0.085 | $2.2 \times 10^{-11}$  | 0.03   | 0.2955                                 | Yes |
| rs10093110  | 8  | 106565414 | <i>ZFPM2</i>                 | G | 0.032 | $1.9 \times 10^{-8}$   | 0.013  | 0.4529                                 | Yes |
| rs2954029   | 8  | 126490972 | <i>TRIB1</i>                 | A | 0.055 | $5.8 \times 10^{-23}$  | -0.001 | 0.9354                                 | No  |
| rs896655    | 9  | 21706571  | <i>CDKN2B,CDKN2A</i>         | A | 0.040 | $1.6 \times 10^{-12}$  | 0.047  | <b>0.0054</b>                          | Yes |
| rs3731249   | 9  | 21970916  | <i>CDKN2B,CDKN2A</i>         | T | 0.171 | $5.4 \times 10^{-11}$  | -0.044 | 0.4951                                 | No  |
| rs4977754   | 9  | 22062012  | <i>CDKN2B,CDKN2A</i>         | A | 0.108 | $5.9 \times 10^{-8}$   | 0.008  | 0.8478                                 | Yes |
| rs1855185   | 9  | 22073996  | <i>CDKN2B,CDKN2A</i>         | G | 0.128 | $8.5 \times 10^{-11}$  | -0.012 | 0.7387                                 | No  |
| rs2891168   | 9  | 22098619  | <i>CDKN2B,CDKN2A</i>         | G | 0.189 | $5.2 \times 10^{-204}$ | 0.063  | <b><math>1.3 \times 10^{-4}</math></b> | Yes |
| rs13301964  | 9  | 22113324  | <i>CDKN2B,CDKN2A</i>         | G | 0.212 | $9.6 \times 10^{-10}$  | 0.169  | <b>0.0216</b>                          | Yes |
| rs944172    | 9  | 110517794 | <i>KLF4</i>                  | C | 0.042 | $1.1 \times 10^{-11}$  | 0.025  | 0.1603                                 | Yes |
| rs111245230 | 9  | 113169775 | <i>SVEP1</i>                 | C | 0.098 | $8.0 \times 10^{-9}$   | 0.181  | <b><math>2.3 \times 10^{-4}</math></b> | Yes |
| rs885150    | 9  | 124420173 | <i>DAB2IP</i>                | C | 0.036 | $7.9 \times 10^{-10}$  | -0.004 | 0.8496                                 | No  |
| rs507666    | 9  | 136149399 | <i>ABO</i>                   | A | 0.073 | $4.7 \times 10^{-20}$  | 0.01   | 0.6524                                 | Yes |
| rs61848342  | 10 | 12303813  | <i>CDC123</i>                | C | 0.036 | $6.4 \times 10^{-10}$  | -0.005 | 0.7550                                 | No  |
| rs9337951   | 10 | 30317073  | <i>KIAA1462</i>              | A | 0.062 | $1.1 \times 10^{-17}$  | 0.032  | 0.1660                                 | Yes |
| rs1870634   | 10 | 44480811  | <i>CXCL12</i>                | G | 0.060 | $3.5 \times 10^{-24}$  | 0.019  | 0.2410                                 | Yes |
| rs1657346   | 10 | 44777560  | <i>CXCL12</i>                | G | 0.092 | $1.6 \times 10^{-24}$  | 0.03   | 0.2069                                 | Yes |
| rs17680741  | 10 | 82251514  | <i>TSPAN14</i>               | T | 0.047 | $2.3 \times 10^{-11}$  | -0.008 | 0.6738                                 | No  |

|            |    |           |                       |   |       |                       |        |                      |     |
|------------|----|-----------|-----------------------|---|-------|-----------------------|--------|----------------------|-----|
| rs2246942  | 10 | 91004886  | LIPA                  | G | 0.071 | $2.2 \times 10^{-24}$ | 0.019  | 0.2648               | Yes |
| rs3740390  | 10 | 104638480 | AS3MT,CYP17A1,CNNM2   | C | 0.072 | $4.4 \times 10^{-15}$ | 0.008  | 0.7783               | Yes |
| rs4918072  | 10 | 105693644 | STN1                  | A | 0.042 | $2.6 \times 10^{-9}$  | 0.011  | 0.5477               | Yes |
| rs4752700  | 10 | 124237612 | HTRA1                 | G | 0.033 | $8.0 \times 10^{-11}$ | 0.024  | 0.1488               | Yes |
| rs11601507 | 11 | 5701074   | TRIM5,TRIM22          | A | 0.084 | $2.1 \times 10^{-12}$ | 0.005  | 0.8808               | Yes |
| rs10840293 | 11 | 9751196   | SWAP70                | A | 0.046 | $9.0 \times 10^{-13}$ | 0.014  | 0.3747               | Yes |
| rs11042937 | 11 | 10745394  | MRVI1,CTR9            | T | 0.010 | $2.0 \times 10^{-1}$  | -0.001 | 0.9321               | No  |
| rs1351525  | 11 | 13301548  | ARNTL                 | T | 0.048 | $4.1 \times 10^{-8}$  | -0.026 | 0.1092               | No  |
| rs7116641  | 11 | 43696917  | HSD17B12              | G | 0.031 | $1.0 \times 10^{-8}$  | -0.008 | 0.6300               | No  |
| rs12801636 | 11 | 65391317  | PCNX3                 | G | 0.040 | $2.3 \times 10^{-11}$ | 0.002  | 0.8969               | Yes |
| rs590121   | 11 | 75274150  | SERPINH1              | T | 0.039 | $2.4 \times 10^{-10}$ | 0.018  | 0.2757               | Yes |
| rs659418   | 11 | 75284334  | SERPINH1              | T | 0.053 | $3.9 \times 10^{-9}$  | 0.006  | 0.7557               | Yes |
| rs7947761  | 11 | 100624599 | ARHGAP42              | G | 0.042 | $3.0 \times 10^{-9}$  | -0.012 | 0.4990               | No  |
| rs974819   | 11 | 103660567 | PDGFD,DYNC2H1         | T | 0.073 | $1.2 \times 10^{-25}$ | 0.004  | 0.8418               | Yes |
| rs964184   | 11 | 116648917 | APOA1-A5-A4-C3,ZNF259 | G | 0.071 | $8.0 \times 10^{-15}$ | 0.003  | 0.8913               | Yes |
| rs11838267 | 12 | 7175872   | C1S                   | T | 0.051 | $6.2 \times 10^{-10}$ | 0.002  | 0.9474               | Yes |
| rs10841443 | 12 | 20220033  | LOC156393             | G | 0.051 | $7.9 \times 10^{-14}$ | 0      | 0.9869               | Yes |
| rs11170820 | 12 | 54513915  | HOXC4                 | G | 0.097 | $1.1 \times 10^{-13}$ | 0.044  | 0.0782               | Yes |
| rs11172113 | 12 | 57527283  | LRP1                  | C | 0.039 | $2.4 \times 10^{-5}$  | 0.025  | 0.1074               | Yes |
| rs2681492  | 12 | 90013089  | ATP2B1                | C | 0.063 | $2.6 \times 10^{-15}$ | 0.016  | 0.4504               | Yes |
| rs7306455  | 12 | 95355541  | NDUFA12               | G | 0.055 | $1.0 \times 10^{-8}$  | -0.005 | 0.8370               | No  |
| rs3184504  | 12 | 111884608 | SH2B3,ATXN2,HNF1A     | T | 0.074 | $5.1 \times 10^{-30}$ | 0.007  | 0.7100               | Yes |
| rs11830157 | 12 | 118265441 | KSR2                  | G | 0.030 | $1.7 \times 10^{-3}$  | -0.034 | 0.0546               | No  |
| rs2244608  | 12 | 121416988 | HNF1A                 | G | 0.052 | $7.3 \times 10^{-19}$ | 0.03   | 0.0925               | Yes |
| rs11057401 | 12 | 124427306 | SCARB1,CCDC92         | T | 0.038 | $2.2 \times 10^{-8}$  | 0.011  | 0.5417               | Yes |
| rs11057830 | 12 | 125307053 | SCARB1,CCDC92         | A | 0.082 | $2.7 \times 10^{-20}$ | 0.085  | $7.8 \times 10^{-5}$ | Yes |
| rs9319428  | 13 | 28973621  | FLT1                  | A | 0.039 | $1.0 \times 10^{-6}$  | 0.021  | 0.2153               | Yes |
| rs9591012  | 13 | 33058333  | N4BP2L2               | G | 0.044 | $7.0 \times 10^{-11}$ | -0.005 | 0.7997               | No  |
| rs11617955 | 13 | 110818102 | COL4A1/A2             | T | 0.081 | $3.6 \times 10^{-17}$ | -0.002 | 0.9505               | No  |
| rs3809346  | 13 | 110960943 | COL4A1/A2             | A | 0.050 | $8.9 \times 10^{-18}$ | -0.007 | 0.6887               | No  |
| rs11838776 | 13 | 111040681 | COL4A1/A2             | A | 0.055 | $3.6 \times 10^{-9}$  | 0.078  | $1.7 \times 10^{-5}$ | Yes |
| rs9515203  | 13 | 111049623 | COL4A1/A2             | T | 0.068 | $5.8 \times 10^{-24}$ | 0.03   | 0.1037               | Yes |

|             |    |           |                     |           |       |                       |        |               |     |
|-------------|----|-----------|---------------------|-----------|-------|-----------------------|--------|---------------|-----|
| rs1317507   | 13 | 113631780 | MCF2L               | A         | 0.043 | $8.5 \times 10^{-12}$ | 0.038  | <b>0.0468</b> | Yes |
| rs2145598   | 14 | 58794001  | ARID4A              | G         | 0.028 | $4.3 \times 10^{-8}$  | 0.004  | 0.7857        | Yes |
| rs3832966   | 14 | 75614504  | TMED10              | ACC<br>CG | 0.053 | $5.8 \times 10^{-10}$ | -0.03  | 0.2477        | No  |
| rs112635299 | 14 | 94838142  | SERPINA1,SERPINA2   | G         | 0.136 | $8.4 \times 10^{-10}$ | -0.044 | 0.6096        | No  |
| rs2895811   | 14 | 100133942 | HHIPL1,CYP46A1      | C         | 0.039 | $9.1 \times 10^{-7}$  | 0.034  | <b>0.0469</b> | Yes |
| rs8003602   | 14 | 100148961 | HHIPL1,CYP46A1      | C         | 0.061 | $4.9 \times 10^{-16}$ | 0.053  | <b>0.0028</b> | Yes |
| rs6494488   | 15 | 65024204  | OAZ2,RBPMS2         | A         | 0.038 | $3.9 \times 10^{-8}$  | 0.025  | 0.2126        | Yes |
| rs17228058  | 15 | 67450305  | SMAD3               | A         | 0.066 | $3.7 \times 10^{-17}$ | -0.004 | 0.8331        | No  |
| rs8039034   | 15 | 79017861  | ADAMTS7             | C         | 0.073 | $4.9 \times 10^{-14}$ | -0.001 | 0.9716        | No  |
| rs11637783  | 15 | 79139000  | ADAMTS7             | T         | 0.074 | $1.2 \times 10^{-30}$ | 0.016  | 0.3533        | Yes |
| rs8042271   | 15 | 89574218  | MFGE8-ABHD2         | G         | 0.086 | $6.1 \times 10^{-7}$  | 0.014  | 0.5480        | Yes |
| rs17514846  | 15 | 91416550  | FURIN               | A         | 0.061 | $7.8 \times 10^{-27}$ | -0.012 | 0.5012        | No  |
| rs17581137  | 15 | 96146414  | LINC00924 (15q26.2) | A         | 0.037 | $1.2 \times 10^{-8}$  | 0.034  | 0.0743        | Yes |
| rs1800775   | 16 | 56995236  | CETP                | C         | 0.039 | $2.5 \times 10^{-6}$  | 0.013  | 0.3903        | Yes |
| rs1050362   | 16 | 72130815  | DHX38,TXNL4B        | A         | 0.039 | $2.7 \times 10^{-11}$ | 0.011  | 0.5159        | Yes |
| rs12930452  | 16 | 75462055  | CFDP1               | G         | 0.052 | $1.2 \times 10^{-15}$ | 0.011  | 0.5676        | Yes |
| rs7199941   | 16 | 81906423  | PLCG2               | A         | 0.040 | $9.2 \times 10^{-13}$ | 0.012  | 0.4924        | Yes |
| rs7500448   | 16 | 83045790  | CDH13               | A         | 0.063 | $1.6 \times 10^{-16}$ | -0.01  | 0.6623        | No  |
| rs216172    | 17 | 2126504   | SMG6,SRR            | C         | 0.039 | $2.3 \times 10^{-5}$  | 0.004  | 0.8156        | Yes |
| rs170041    | 17 | 2170216   | SMG6,SRR            | C         | 0.051 | $9.3 \times 10^{-17}$ | -0.01  | 0.5928        | No  |
| rs12936587  | 17 | 17543722  | RASD1, SMCR3, PEMT  | G         | 0.030 | $1.8 \times 10^{-3}$  | 0.009  | 0.5821        | Yes |
| rs13723     | 17 | 27941886  | CORO6,ANKRD13B      | G         | 0.040 | $5.6 \times 10^{-10}$ | -0.011 | 0.5259        | No  |
| rs76954792  | 17 | 30033514  | (17q11.2)           | T         | 0.039 | $1.2 \times 10^{-8}$  | 0.018  | 0.4069        | Yes |
| rs2074158   | 17 | 40257163  | DHX58,KAT2A         | C         | 0.054 | $2.3 \times 10^{-10}$ | 0.047  | <b>0.0123</b> | Yes |
| rs17608766  | 17 | 45013271  | GOSR2               | C         | 0.047 | $8.2 \times 10^{-10}$ | -0.032 | 0.2493        | No  |
| rs3895874   | 17 | 47047868  | UBE2Z,GIP           | A         | 0.041 | $1.5 \times 10^{-9}$  | 0.024  | 0.1543        | Yes |
| rs16948048  | 17 | 47440466  | UBE2Z,ZNF652        | G         | 0.053 | $2.7 \times 10^{-16}$ | 0.025  | 0.1110        | Yes |
| rs7212798   | 17 | 59013488  | BCAS3               | C         | 0.068 | $2.2 \times 10^{-8}$  | 0.037  | 0.0951        | Yes |
| rs1867624   | 17 | 62387091  | PECAM1              | T         | 0.037 | $8.1 \times 10^{-11}$ | 0.003  | 0.8606        | Yes |
| rs9964304   | 18 | 47229717  | ACAA2               | C         | 0.038 | $1.1 \times 10^{-9}$  | 0.036  | <b>0.0284</b> | Yes |
| rs663129    | 18 | 57838401  | PMAIP1,MC4R         | A         | 0.039 | $1.8 \times 10^{-5}$  | 0.016  | 0.3634        | Yes |

|             |    |          |                          |   |       |                       |        |               |     |
|-------------|----|----------|--------------------------|---|-------|-----------------------|--------|---------------|-----|
| rs116843064 | 19 | 8429323  | <i>ANGPTL4</i>           | G | 0.161 | $1.3 \times 10^{-11}$ | 0.02   | 0.7975        | Yes |
| rs6511720   | 19 | 11202306 | <i>LDLR</i>              | G | 0.136 | $4.9 \times 10^{-41}$ | 0.037  | 0.1253        | Yes |
| rs4804573   | 19 | 11277232 | <i>LDLR</i>              | G | 0.049 | $1.9 \times 10^{-8}$  | -0.011 | 0.5313        | No  |
| rs73015714  | 19 | 17855763 | <i>MAP1S,FCHO1</i>       | G | 0.059 | $8.4 \times 10^{-14}$ | -0.006 | 0.7225        | No  |
| rs12976411  | 19 | 32882020 | <i>ZNF507,LOC400684</i>  | A | 0.039 | $2.9 \times 10^{-2}$  | -0.083 | <b>0.0145</b> | No  |
| rs60315715  | 19 | 41790086 | <i>TGFB1,CCDC97</i>      | G | 0.070 | $9.4 \times 10^{-9}$  | -0.009 | 0.7506        | No  |
| rs12980942  | 19 | 41832231 | <i>TGFB1,CCDC97</i>      | G | 0.061 | $7.4 \times 10^{-15}$ | 0.002  | 0.9372        | Yes |
| rs4803455   | 19 | 41851509 | <i>TGFB1,CCDC97</i>      | C | 0.054 | $3.8 \times 10^{-17}$ | 0.016  | 0.3134        | Yes |
| rs7412      | 19 | 45412079 | <i>APOE,APOC1,TOMM4</i>  | C | 0.160 | $3.0 \times 10^{-39}$ | 0.08   | <b>0.0062</b> | Yes |
| rs4420638   | 19 | 45422946 | <i>APOE,APOC1,TOMM4</i>  | G | 0.090 | $2.7 \times 10^{-14}$ | 0.004  | 0.8577        | Yes |
| rs1964272   | 19 | 46190268 | <i>SNRPD2</i>            | G | 0.046 | $7.5 \times 10^{-8}$  | 0.017  | 0.2833        | Yes |
| rs6088590   | 20 | 33313566 | <i>NCOA6</i>             | C | 0.034 | $2.3 \times 10^{-9}$  | 0.011  | 0.4885        | Yes |
| rs867186    | 20 | 33764554 | <i>PROCR</i>             | A | 0.057 | $6.8 \times 10^{-12}$ | -0.008 | 0.7686        | No  |
| rs6102343   | 20 | 39924279 | <i>ZHX3</i>              | A | 0.037 | $1.1 \times 10^{-8}$  | 0.016  | 0.3394        | Yes |
| rs3827066   | 20 | 44586023 | <i>PCIF1,ZNF335</i>      | T | 0.042 | $4.4 \times 10^{-9}$  | 0.067  | <b>0.0057</b> | Yes |
| rs260020    | 20 | 57714025 | <i>ZNF831</i>            | T | 0.052 | $8.0 \times 10^{-10}$ | -0.014 | 0.4950        | No  |
| rs2832227   | 21 | 30533076 | <i>MAP3K7CL</i>          | G | 0.044 | $1.7 \times 10^{-9}$  | 0.055  | <b>0.0030</b> | Yes |
| rs28451064  | 21 | 35593827 | <i>MRPS6</i>             | A | 0.119 | $7.1 \times 10^{-33}$ | 0.037  | 0.2016        | Yes |
| rs180803    | 22 | 24658858 | <i>POM121L9P,ADORA2A</i> | G | 0.168 | $3.3 \times 10^{-10}$ | -0.055 | 0.4329        | No  |

CHR, chromosome; POS, position in GRCh37; rsID, reference SNP id. Bold indicate  $P < 0.05$  and those in red indicate  $P < 0.00024$  (0.05/204)

**Table S9. Phenome-wide associatino of three significant variant in Common Metabolic Disease Knowledge Portal**

| Variant     | CHR | POS       | Phenotype                                                   | P        | Beta   | Std Err | N         | Data Set                              |
|-------------|-----|-----------|-------------------------------------------------------------|----------|--------|---------|-----------|---------------------------------------|
| rs147138607 | 1   | 181855562 | TOAST small artery occlusion                                | 0.000663 | 1.432  | 0.421   | 42,161    | GWAS_MEGASTROKE_eu                    |
|             |     |           | Any stroke                                                  | 0.001524 | 1.169  | 0.369   | 117,779   | GWAS_MEGASTROKE_eu                    |
|             |     |           | All ischemic stroke                                         | 0.001702 | 1.176  | 0.375   | 114,513   | GWAS_MEGASTROKE_eu                    |
|             |     |           | Iron deficiency                                             | 0.00318  | 0.318  | 0.108   | 9,335     | GWAS_GERA_eu                          |
|             |     |           | Ulcerative colitis                                          | 0.01242  | -0.237 | 0.095   | 58,715    | GWAS_IBDGenetics_eu                   |
|             |     |           | Waist-hip ratio adj BMI                                     | 0.01832  | 0.202  | 0.086   | 1,200     |                                       |
|             |     |           | HbA1c                                                       | 0.02227  | 0.038  | 0.017   | 42,790    | GWAS_BBJ_ea                           |
|             |     |           | Triglycerides                                               | 0.02344  | 0.01   | 0.004   | 1,391,500 | GWAS_BBJ_ea                           |
|             |     |           | All diabetic kidney disease                                 | 0.03642  | -0.235 | 0.096   | 18,449    | GWAS_DNCRI                            |
|             |     |           | All diabetic kidney disease vs. controls                    | 0.03879  | -0.224 | 0.108   | 26,180    | Sandholm_2021_GENIE_EU                |
|             |     |           | Type 2 diabetes adj BMI                                     | 0.044    | 0.14   | 0.071   | 59,918    | GWAS_DIAGRAMimputed_eu                |
|             |     |           | Peripheral vascular disease                                 | 0.04567  | -0.197 | 0.099   | 15,897    | GWAS_GERA_eu                          |
| rs77142250  | 4   | 11444867  | Percentage of sleep with oxyhemoglobin saturation under 90% | 0.000149 | 4.475  | 1.18    | 2,300     | Cade2021_SleepApnea_Mixed_Female_Male |
|             |     |           | Percentage of sleep with oxyhemoglobin saturation under 90% | 0.00022  | 5.213  | 1.411   | 1,374     | Cade2021_SleepApnea_Mixed_Female_Male |

|          |   |           |                                                                          |          |            |       |         |                                       |
|----------|---|-----------|--------------------------------------------------------------------------|----------|------------|-------|---------|---------------------------------------|
|          |   |           | Average<br>oxyhemoglobin<br>saturation during<br>sleep                   | 0.02535  | -<br>0.782 | 0.35  | 1,340   | Cade2021_SleepApnea_Mixed_Female      |
|          |   |           | Minimum<br>oxyhemoglobin<br>saturation during<br>sleep                   | 0.02813  | -<br>1.907 | 0.869 | 2,264   | Cade2021_SleepApnea_Mixed_Female_Male |
|          |   |           | BMI                                                                      | 0.03446  | 0.053      | 0.036 | 498,806 | GWAS_UKBiobankGIANT_eu                |
|          |   |           | Serum albumin                                                            | 0.04183  | 0.091      | 0.042 | 14,126  | Gurdasani2019_UGR_metabolic_traits_af |
| rs335407 | 6 | 155665441 | BMI                                                                      | 0.003705 | 0.014      | 0.005 | 878,357 | GWAS_GiantUKBB_eu                     |
|          |   |           | Snoring adj BMI                                                          | 0.0046   | -<br>0.009 | 0.003 | 380,804 | GWAS_UKBiobankSnoringAdjBMI_eu        |
|          |   |           | Snoring                                                                  | 0.013    | -<br>0.008 | 0.003 | 381,973 | GWAS_UKBiobankSnoring_eu              |
|          |   |           | Fasting glucose<br>adj BMI                                               | 0.02331  | -<br>0.008 | 0.004 | 221,149 | GWAS_FUSION_eu                        |
|          |   |           | CAD or stroke or<br>peripheral<br>vascular disease<br>in type 2 diabetes | 0.02376  | 0.255      | 0.113 | 300     | GWAS_CUHK_ea                          |
|          |   |           | Disposition index                                                        | 0.02424  | 0.11       | 0.047 | 5,130   | GWAS_MAGIC-InsulinSecretionOGTT_eu    |
|          |   |           | Diabetic<br>nephropathy                                                  | 0.02611  | 0.2        | 0.09  | 3,854   | GWAS_FinnGen_eu                       |
|          |   |           | Controls vs thin                                                         | 0.02867  | 0.273      | 0.125 | 4,792   | GWAS_SCOOPaSTILTS_eu                  |
|          |   |           | Sleep midpoint<br>timing                                                 | 0.033    | -<br>0.031 | 0.015 | 85,502  |                                       |
|          |   |           | Mean arterial<br>pressure                                                | 0.0357   | 0.037      | 0.018 | 136,482 | GWAS_BBJ_ea                           |
|          |   |           | Any stroke                                                               | 0.04133  | 1.061      | 0.52  | 404,096 | GWAS_MEGASTROKE_eu                    |
|          |   |           | TOAST cardio-<br>aortic embolism                                         | 0.04259  | 1.133      | 0.559 | 259,206 | GWAS_MEGASTROKE_eu                    |

|                                                                  |         |            |       |       |                                    |
|------------------------------------------------------------------|---------|------------|-------|-------|------------------------------------|
| Corrected insulin<br>response adj<br>Matsuda ISI                 | 0.04625 | 0.099      | 0.049 | 4,789 | GWAS_MAGIC-InsulinSecretionOGTT_eu |
| Insulin sensitivity                                              | 0.04756 | 0.161      | 0.082 | 2,765 | GWAS_GENESIS_eu                    |
| Proliferative<br>diabetic<br>retinopathy vs no<br>DR             | 0.04887 | -<br>0.342 | 0.158 | 1,487 | GWAS_DiabeticRetino_aa             |
| Proliferative<br>diabetic<br>retinopathy vs no<br>DR acct DoD-GC | 0.04899 | -0.29      | 0.146 | 1,487 | GWAS_DiabeticRetino_aa             |

## REFERENCES

1. ElSayed NA, Aleppo G, Aroda VR, Bannuru RR, Brown FM, Bruemmer D, Collins BS, Hilliard ME, Isaacs D, Johnson EL, Kahan S, Khunti K, Leon J, Lyons SK, Perry ML, Prahalad P, Pratley RE, Seley JJ, Stanton RC, Gabbay RA, on behalf of the American Diabetes A. 2. Classification and Diagnosis of Diabetes: Standards of Care in Diabetes-2023. *Diabetes Care* 2023;46:S19-S40
2. Therneau TM. A Package for Survival Analysis in R. 2022;
3. Winkler TW, Day FR, Croteau-Chonka DC, Wood AR, Locke AE, Magi R, Ferreira T, Fall T, Graff M, Justice AE, Luan J, Gustafsson S, Randall JC, Vedantam S, Workalemahu T, Kilpelainen TO, Scherag A, Esko T, Kutalik Z, Heid IM, Loos RJ, Genetic Investigation of Anthropometric Traits C. Quality control and conduct of genome-wide association meta-analyses. *Nat Protoc* 2014;9:1192-1212
4. Hinrichs AS, Karolchik D, Baertsch R, Barber GP, Bejerano G, Clawson H, Diekhans M, Furey TS, Harte RA, Hsu F, Hillman-Jackson J, Kuhn RM, Pedersen JS, Pohl A, Raney BJ, Rosenbloom KR, Siepel A, Smith KE, Sugnet CW, Sultan-Qurraie A, Thomas DJ, Trumbower H, Weber RJ, Weirauch M, Zweig AS, Haussler D, Kent WJ. The UCSC Genome Browser Database: update 2006. *Nucleic Acids Res* 2006;34:D590-598
5. Willer CJ, Li Y, Abecasis GR. METAL: fast and efficient meta-analysis of genomewide association scans. *Bioinformatics* 2010;26:2190-2191
6. Pe'er I, Yelensky R, Altshuler D, Daly MJ. Estimation of the multiple testing burden for genomewide association studies of nearly all common variants. *Genet Epidemiol* 2008;32:381-385
7. Suzuki K, Hatzikotoulas K, Southam L, Taylor HJ, Yin X, Lorenz KM, Mandla R, Huerta-Chagoya A, Melloni GEM, Kanoni S, Rayner NW, Bocher O, Arruda AL, Sonehara K, Namba S, Lee SSK, Preuss MH, Petty LE, Schroeder P, Vanderwerff B, Kals M, Bragg F, Lin K, Guo X, Zhang W, Yao J, Kim YJ, Graff M, Takeuchi F, Nano J, Lamri A, Nakatochi M, Moon S, Scott RA, Cook JP, Lee JJ, Pan I, Taliun D, Parra EJ, Chai JF, Bielak LF, Tabara Y, Hai Y, Thorleifsson G, Grarup N, Sofer T, Wuttke M, Sarnowski C, Gieger C, Nounsou D, Trompet S, Kwak SH, Long J, Sun M, Tong L, Chen WM, Nongmaithem SS, Noordam R, Lim VJY, Tam CHT, Joo YY, Chen CH, Raffield LM, Prins BP, Nicolas A, Yanek LR, Chen G, Brody JA, Kabagambe E, An P, Xiang AH, Choi HS, Cade BE, Tan J, Broadaway KA, Williamson A, Kamali Z, Cui J, Thangam M, Adair LS, Adeyemo A, Aguilar-Salinas CA, Ahluwalia TS, Anand SS, Bertoni A, Bork-Jensen J, Brandslund I, Buchanan TA, Burant CF, Butterworth AS, Canouil M, Chan JCN, Chang LC, Chee ML, Chen J, Chen SH, Chen YT, Chen Z, Chuang LM, Cushman M, Danesh J, Das SK, de Silva HJ, Dedoussis G, Dimitrov L, Doumatey AP, Du S, Duan Q, Eckardt KU, Emery LS, Evans DS, Evans MK, Fischer K, Floyd JS, Ford I, Franco OH, Frayling TM, Freedman BI, Genter P, Gerstein HC, Giedraitis V, Gonzalez-Villalpando C, Gonzalez-Villalpando ME, Gordon-Larsen P, Gross M, Guare LA, Hackinger S, Hakaste L, Han S, Hattersley AT, Herder C, Horikoshi M, Howard AG, Hsueh W, Huang M, Huang W, Hung YJ, Hwang MY, Hwu CM, Ichihara S, Ikram MA, Ingelsson M, Islam MT, Isono M, Jang HM, Jasmine F, Jiang G, Jonas JB, Jorgensen T, Kamanu FK, Kandeel FR, Kasturiratne A, Katsuya T, Kaur V, Kawaguchi T, Keaton JM, Kho AN, Khor CC, Kibriya MG, Kim DH, Kronenberg F, Kuusisto J, Lall K, Lange LA, Lee KM, Lee MS, Lee NR, Leong A, Li L, Li Y, Li-Gao R, Ligthart S, Lindgren CM, Linneberg A, Liu CT, Liu J, Locke AE, Louie T, Luan J, Luk AO, Luo X, Lv J, Lynch JA, Lyssenko V, Maeda S, Mamakou V, Mansuri SR, Matsuda K, Meitinger T, Melander O, Metspalu A, Mo H, Morris AD, Moura FA, Nadler JL, Nalls MA, Nayak U, Ntalla I, Okada Y, Orozco L, Patel SR, Patil S, Pei P, Pereira MA, Peters A, Pirie FJ, Polikowsky HG, Porneala B, Prasad G, Rasmussen-Torvik LJ, Reiner AP, Roden M, Rohde R, Roll K, Sabanayagam C, Sandow K, Sankareswaran A, Sattar N, Schonherr S, Shahriar M, Shen B, Shi J, Shin DM, Shojima N, Smith JA, So WY, Stancakova A, Steinthorsdottir V, Stilp AM, Strauch K, Taylor KD, Thorand B, Thorsteinsdottir U, Tomlinson B, Tran TC, Tsai FJ, Tuomilehto



J, Tusie-Luna T, Udler MS, Valladares-Salgado A, van Dam RM, van Klinken JB, Varma R, Wachter-Rodarte N, Wheeler E, Wickremasinghe AR, van Dijk KW, Witte DR, Yajnik CS, Yamamoto K, Yamamoto K, Yoon K, Yu C, Yuan JM, Yusuf S, Zawistowski M, Zhang L, Zheng W, Program VAMV, Raffel LJ, Igase M, Ipp E, Redline S, Cho YS, Lind L, Province MA, Fornage M, Hanis CL, Ingelsson E, Zonderman AB, Psaty BM, Wang YX, Rotimi CN, Becker DM, Matsuda F, Liu Y, Yokota M, Kardia SLR, Peyser PA, Pankow JS, Engert JC, Bonnefond A, Froguel P, Wilson JG, Sheu WHH, Wu JY, Hayes MG, Ma RCW, Wong TY, Mook-Kanamori DO, Tuomi T, Chandak GR, Collins FS, Bharadwaj D, Pare G, Sale MM, Ahsan H, Motala AA, Shu XO, Park KS, Jukema JW, Cruz M, Chen YI, Rich SS, McKean-Cowdin R, Grallert H, Cheng CY, Ghanbari M, Tai ES, Dupuis J, Kato N, Laakso M, Kottgen A, Koh WP, Bowden DW, Palmer CNA, Kooner JS, Kooperberg C, Liu S, North KE, Saleheen D, Hansen T, Pedersen O, Wareham NJ, Lee J, Kim BJ, Millwood IY, Walters RG, Stefansson K, Ahlqvist E, Goodarzi MO, Mohlke KL, Langenberg C, Haiman CA, Loos RJF, Florez JC, Rader DJ, Ritchie MD, Zollner S, Magi R, Marston NA, Ruff CT, van Heel DA, Finer S, Denny JC, Yamauchi T, Kadowaki T, Chambers JC, Ng MCY, Sim X, Below JE, Tsao PS, Chang KM, McCarthy MI, Meigs JB, Mahajan A, Spracklen CN, Mercader JM, Boehnke M, Rotter JI, Vujkovic M, Voight BF, Morris AP, Zeggini E. Genetic drivers of heterogeneity in type 2 diabetes pathophysiology. *Nature* 2024;

8. Yang J, Ferreira T, Morris AP, Medland SE, Genetic Investigation of ATC, Replication DIG, Meta-analysis C, Madden PA, Heath AC, Martin NG, Montgomery GW, Weedon MN, Loos RJ, Frayling TM, McCarthy MI, Hirschhorn JN, Goddard ME, Visscher PM. Conditional and joint multiple-SNP analysis of GWAS summary statistics identifies additional variants influencing complex traits. *Nat Genet* 2012;44:369-375, S361-363

9. Mahajan A, Wessel J, Willems SM, Zhao W, Robertson NR, Chu AY, Gan W, Kitajima H, Taliun D, Rayner NW, Guo X, Lu Y, Li M, Jensen RA, Hu Y, Huo S, Lohman KK, Zhang W, Cook JP, Prins BP, Flannick J, Grarup N, Trubetskoy VV, Kravic J, Kim YJ, Rybin DV, Yaghootkar H, Muller-Nurasyid M, Meidtner K, Li-Gao R, Varga TV, Marten J, Li J, Smith AV, An P, Ligthart S, Gustafsson S, Malerba G, Demirkan A, Tajes JF, Steinthorsdottir V, Wuttke M, Lecoeur C, Preuss M, Bielak LF, Graff M, Highland HM, Justice AE, Liu DJ, Marouli E, Peloso GM, Warren HR, Exome BPC, Consortium M, Consortium G, Afaq S, Afzal S, Ahlqvist E, Almgren P, Amin N, Bang LB, Bertoni AG, Bombieri C, Bork-Jensen J, Brandslund I, Brody JA, Burtt NP, Canouil M, Chen YI, Cho YS, Christensen C, Eastwood SV, Eckardt KU, Fischer K, Gambaro G, Giedraitis V, Grove ML, de Haan HG, Hackinger S, Hai Y, Han S, Tybjaerg-Hansen A, Hivert MF, Isomaa B, Jager S, Jorgensen ME, Jorgensen T, Karajamaki A, Kim BJ, Kim SS, Koistinen HA, Kovacs P, Kriebel J, Kronenberg F, Lall K, Lange LA, Lee JJ, Lehne B, Li H, Lin KH, Linneberg A, Liu CT, Liu J, Loh M, Magi R, Mamakou V, McKean-Cowdin R, Nadkarni G, Neville M, Nielsen SF, Ntalla I, Peyser PA, Rathmann W, Rice K, Rich SS, Rode L, Rolandsson O, Schonherr S, Selvin E, Small KS, Stancakova A, Surendran P, Taylor KD, Teslovich TM, Thorand B, Thorleifsson G, Tin A, Tonjes A, Varbo A, Witte DR, Wood AR, Yajnik P, Yao J, Yengo L, Young R, Amouyel P, Boeing H, Boerwinkle E, Bottinger EP, Chowdhury R, Collins FS, Dedoussis G, Dehghan A, Deloukas P, Ferrario MM, Ferrieres J, Florez JC, Frossard P, Gudnason V, Harris TB, Heckbert SR, Howson JMM, Ingelsson M, Kathiresan S, Kee F, Kuusisto J, Langenberg C, Launer LJ, Lindgren CM, Mannisto S, Meitinger T, Melander O, Mohlke KL, Moitry M, Morris AD, Murray AD, de Mutsert R, Orho-Melander M, Owen KR, Perola M, Peters A, Province MA, Rasheed A, Ridker PM, Rivadineira F, Rosendaal FR, Rosengren AH, Salomaa V, Sheu WH, Sladek R, Smith BH, Strauch K, Uitterlinden AG, Varma R, Willer CJ, Bluher M, Butterworth AS, Chambers JC, Chasman DI, Danesh J, van Duijn C, Dupuis J, Franco OH, Franks PW, Froguel P, Grallert H, Groop L, Han BG, Hansen T, Hattersley AT, Hayward C, Ingelsson E, Kardia SLR, Karpe F, Kooner JS, Kottgen A, Kuulasmaa K, Laakso M, Lin X, Lind L, Liu Y, Loos RJF, Marchini J, Metspalu A, Mook-Kanamori D, Nordestgaard BG, Palmer CNA, Pankow JS, Pedersen O, Psaty BM, Rauramaa R, Sattar N, Schulze MB, Soranzo N, Spector TD, Stefansson K, Stumvoll M, Thorsteinsdottir U, Tuomi T, Tuomilehto J, Wareham NJ, Wilson JG, Zeggini E, Scott RA, Barroso

- I, Frayling TM, Goodarzi MO, Meigs JB, Boehnke M, Saleheen D, Morris AP, Rotter JI, McCarthy MI. Refining the accuracy of validated target identification through coding variant fine-mapping in type 2 diabetes. *Nat Genet* 2018;50:559-571
10. Wakefield J. A Bayesian measure of the probability of false discovery in genetic epidemiology studies. *Am J Hum Genet* 2007;81:208-227
11. Consortium EP. An integrated encyclopedia of DNA elements in the human genome. *Nature* 2012;489:57-74
12. Ernst J, Kellis M. ChromHMM: automating chromatin-state discovery and characterization. *Nat Methods* 2012;9:215-216
13. Wallace C. Eliciting priors and relaxing the single causal variant assumption in colocalisation analyses. *PLoS Genet* 2020;16:e1008720
14. Vosa U, Claringbould A, Westra HJ, Bonder MJ, Deelen P, Zeng B, Kirsten H, Saha A, Kreuzhuber R, Yazar S, Brugge H, Oelen R, de Vries DH, van der Wijst MGP, Kasela S, Pervjakova N, Alves I, Fave MJ, Agbessi M, Christiansen MW, Jansen R, Seppala I, Tong L, Teumer A, Schramm K, Hemani G, Verlouw J, Yaghootkar H, Sonmez Flitman R, Brown A, Kukushkina V, Kalnapekns A, Rueger S, Porcu E, Kronberg J, Kettunen J, Lee B, Zhang F, Qi T, Hernandez JA, Arindrarto W, Beutner F, Consortium B, i QTLC, Dmitrieva J, Elansary M, Fairfax BP, Georges M, Heijmans BT, Hewitt AW, Kahonen M, Kim Y, Knight JC, Kovacs P, Krohn K, Li S, Loeffler M, Marigorta UM, Mei H, Momozawa Y, Muller-Nurasyid M, Nauck M, Nivard MG, Penninx B, Pritchard JK, Raitakari OT, Rotzschke O, Slagboom EP, Stehouwer CDA, Stumvoll M, Sullivan P, t Hoen PAC, Thiery J, Tonjes A, van Dongen J, van Iterson M, Veldink JH, Volker U, Warmerdam R, Wijmenga C, Swertz M, Andiappan A, Montgomery GW, Ripatti S, Perola M, Kutalik Z, Dermitzakis E, Bergmann S, Frayling T, van Meurs J, Prokisch H, Ahsan H, Pierce BL, Lehtimäki T, Boomsma DI, Psaty BM, Gharib SA, Awadalla P, Milani L, Ouwehand WH, Downes K, Stegle O, Battle A, Visscher PM, Yang J, Scholz M, Powell J, Gibson G, Esko T, Franke L. Large-scale cis- and trans-eQTL analyses identify thousands of genetic loci and polygenic scores that regulate blood gene expression. *Nat Genet* 2021;53:1300-1310
15. Mahajan A, Taliun D, Thurner M, Robertson NR, Torres JM, Rayner NW, Payne AJ, Steinthorsdottir V, Scott RA, Grarup N, Cook JP, Schmidt EM, Wuttke M, Sarnowski C, Magi R, Nano J, Gieger C, Trompet S, Lecoeur C, Preuss MH, Prins BP, Guo X, Bielak LF, Below JE, Bowden DW, Chambers JC, Kim YJ, Ng MCY, Petty LE, Sim X, Zhang W, Bennett AJ, Bork-Jensen J, Brummett CM, Canouil M, Ec Kardt KU, Fischer K, Kardina SLR, Kronenberg F, Lall K, Liu CT, Locke AE, Luan J, Ntalla I, Nylander V, Schönherr S, Schurmann C, Yengo L, Bottinger EP, Brandslund I, Christensen C, Dedoussis G, Florez JC, Ford I, Franco OH, Frayling TM, Giedraitis V, Hackinger S, Hattersley AT, Herder C, Ikram MA, Ingelsson M, Jorgensen ME, Jorgensen T, Kriebel J, Kuusisto J, Ligthart S, Lindgren CM, Linneberg A, Lyssenko V, Mamakou V, Meitinger T, Mohlke KL, Morris AD, Nadkarni G, Pankow JS, Peters A, Sattar N, Stancakova A, Strauch K, Taylor KD, Thorand B, Thorleifsson G, Thorsteinsdottir U, Tuomilehto J, Witte DR, Dupuis J, Peyser PA, Zeggini E, Loos RJF, Froguel P, Ingelsson E, Lind L, Groop L, Laakso M, Collins FS, Jukema JW, Palmer CNA, Grallert H, Metspalu A, Dehghan A, Kottgen A, Abecasis GR, Meigs JB, Rotter JI, Marchini J, Pedersen O, Hansen T, Langenberg C, Wareham NJ, Stefansson K, Gloyn AL, Morris AP, Boehnke M, McCarthy MI. Fine-mapping type 2 diabetes loci to single-variant resolution using high-density imputation and islet-specific epigenome maps. *Nat Genet* 2018;50:1505-1513
16. Amado-Azevedo J, Reinhard NR, van Bezu J, de Menezes RX, van Beusechem VW, van Nieuw Amerongen GP, van Hinsbergh VWM, Hordijk PL. A CDC42-centered signaling unit is a dominant positive regulator of endothelial integrity. *Sci Rep* 2017;7:10132
