# Supplementary material
Source: publisher figshare collection journal article supplement (https://diabetesjournals.figshare.com/articles/dataset/_/25444327)

Figure S1

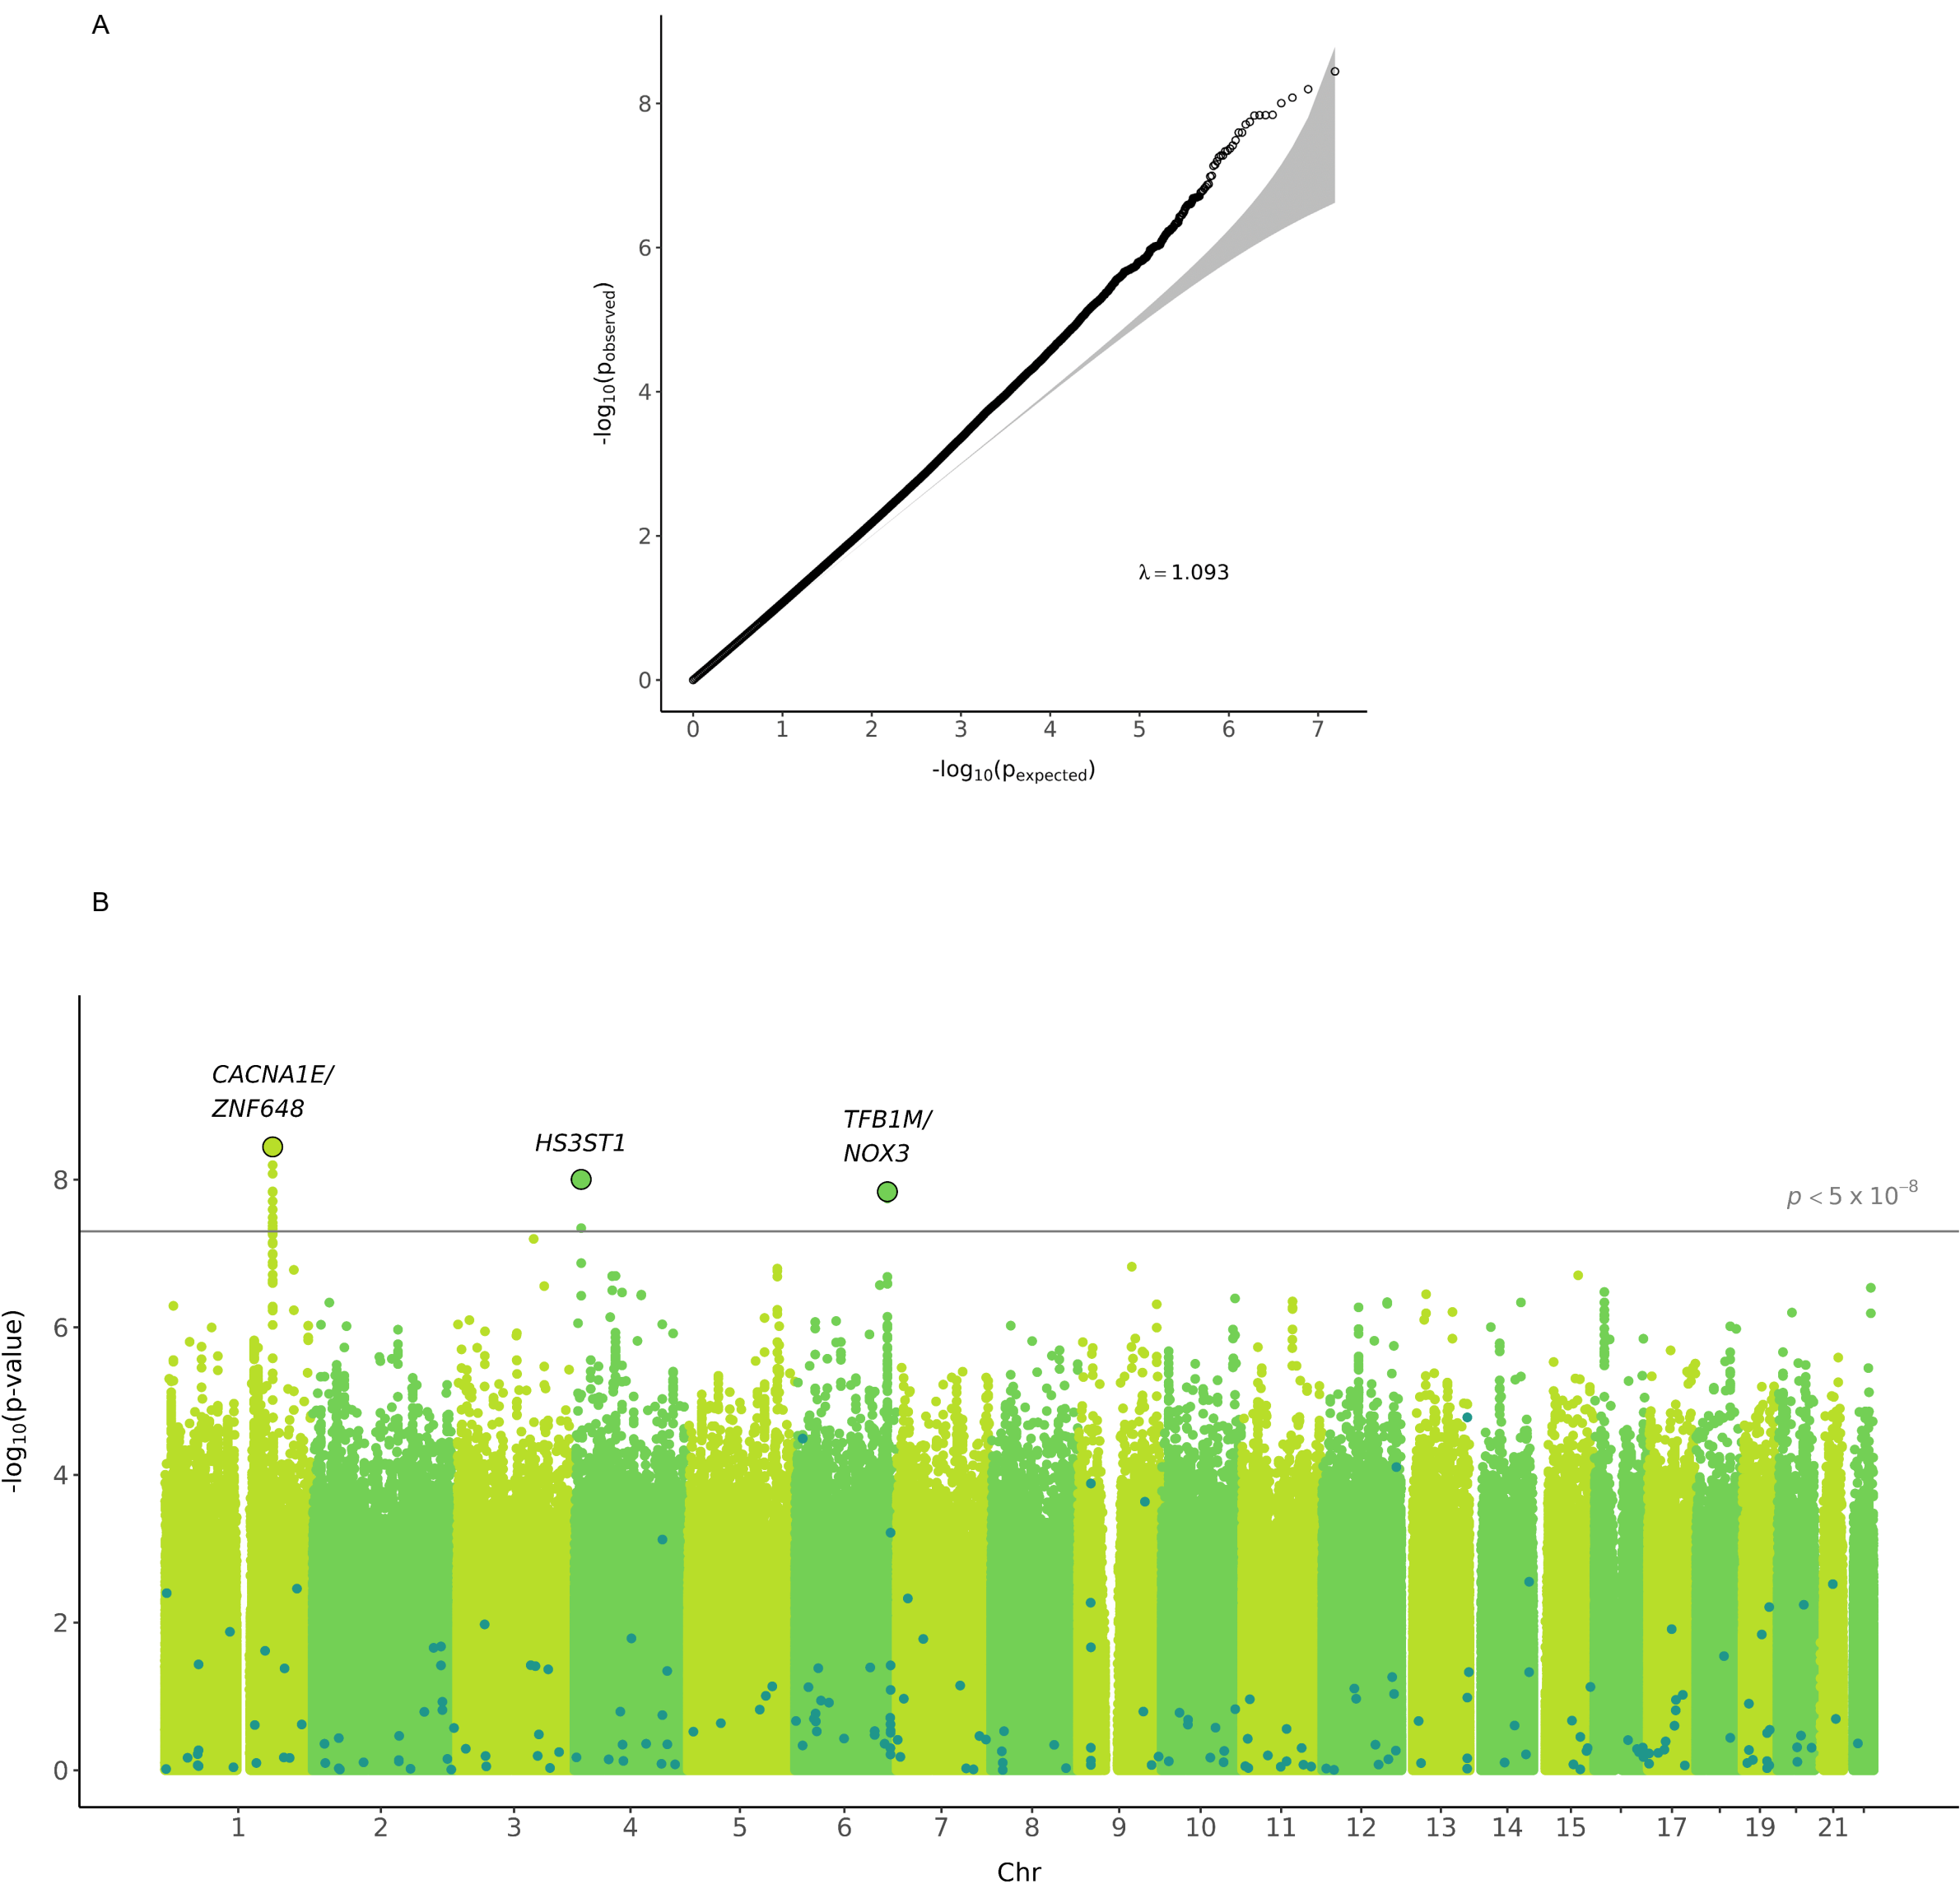

Figure S2

A

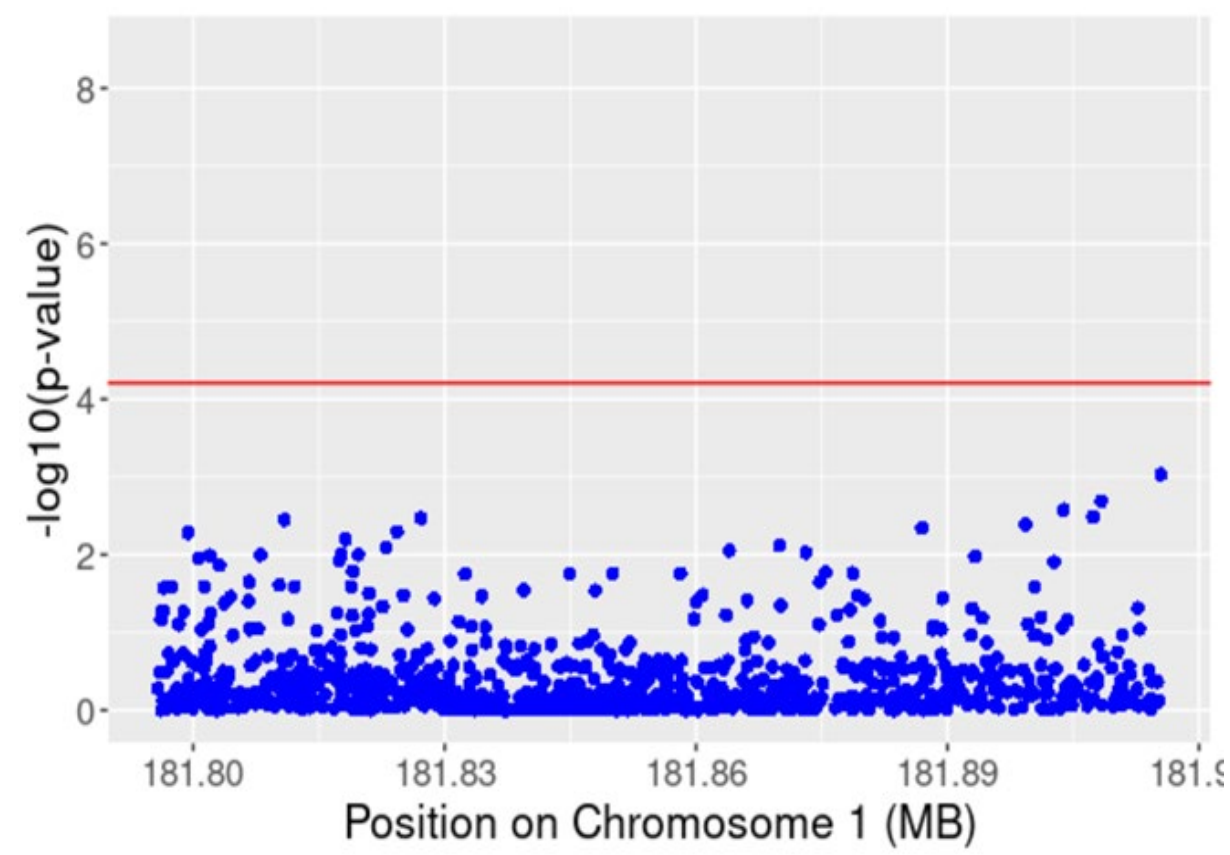

B

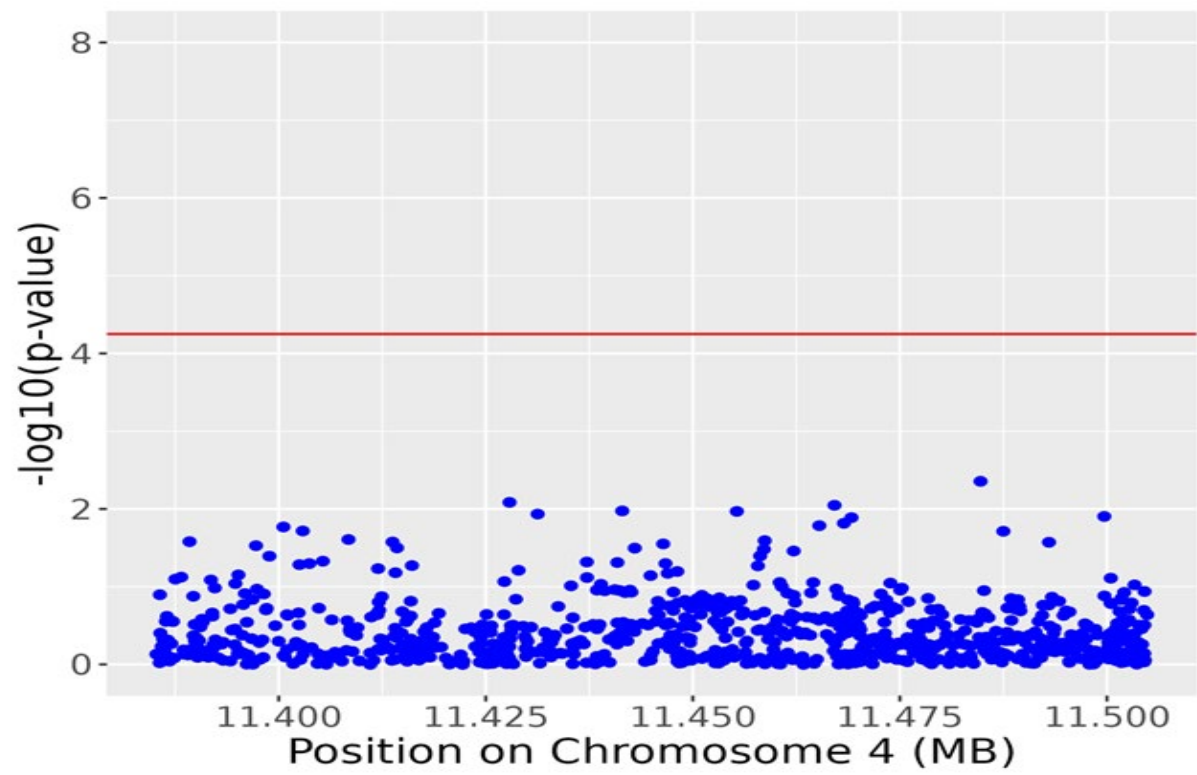

C

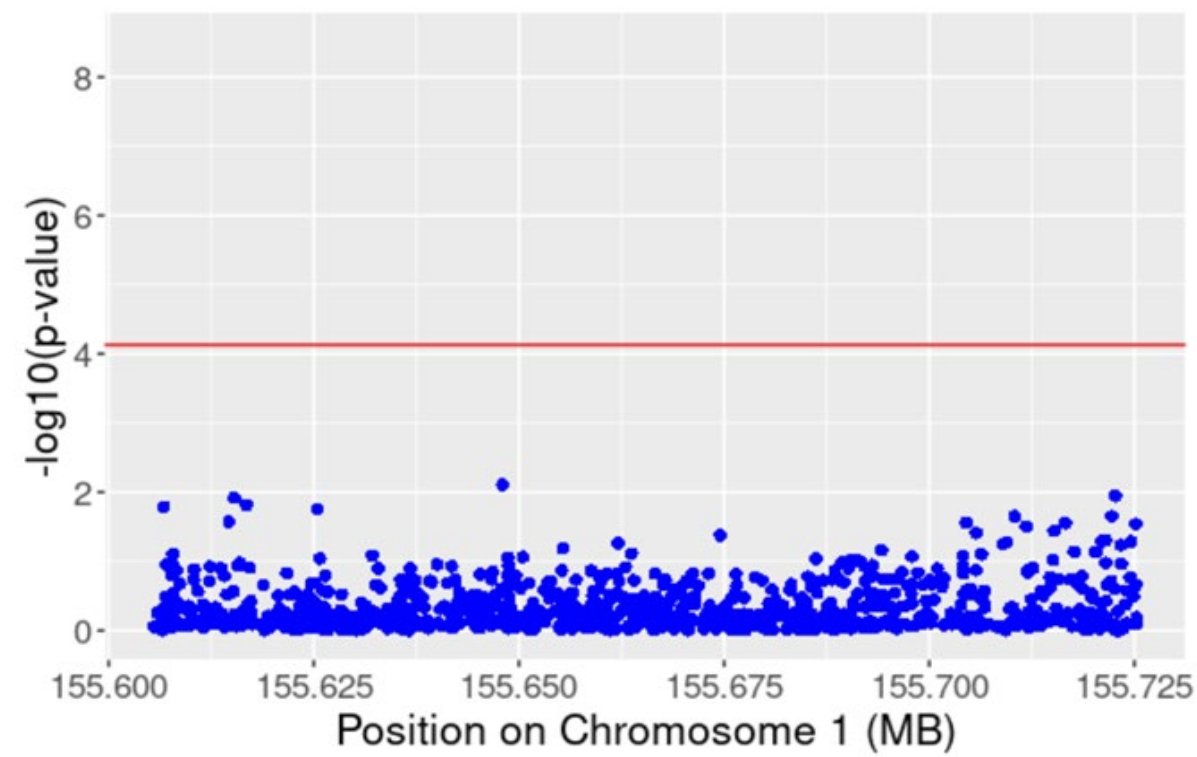

Figure S3

A

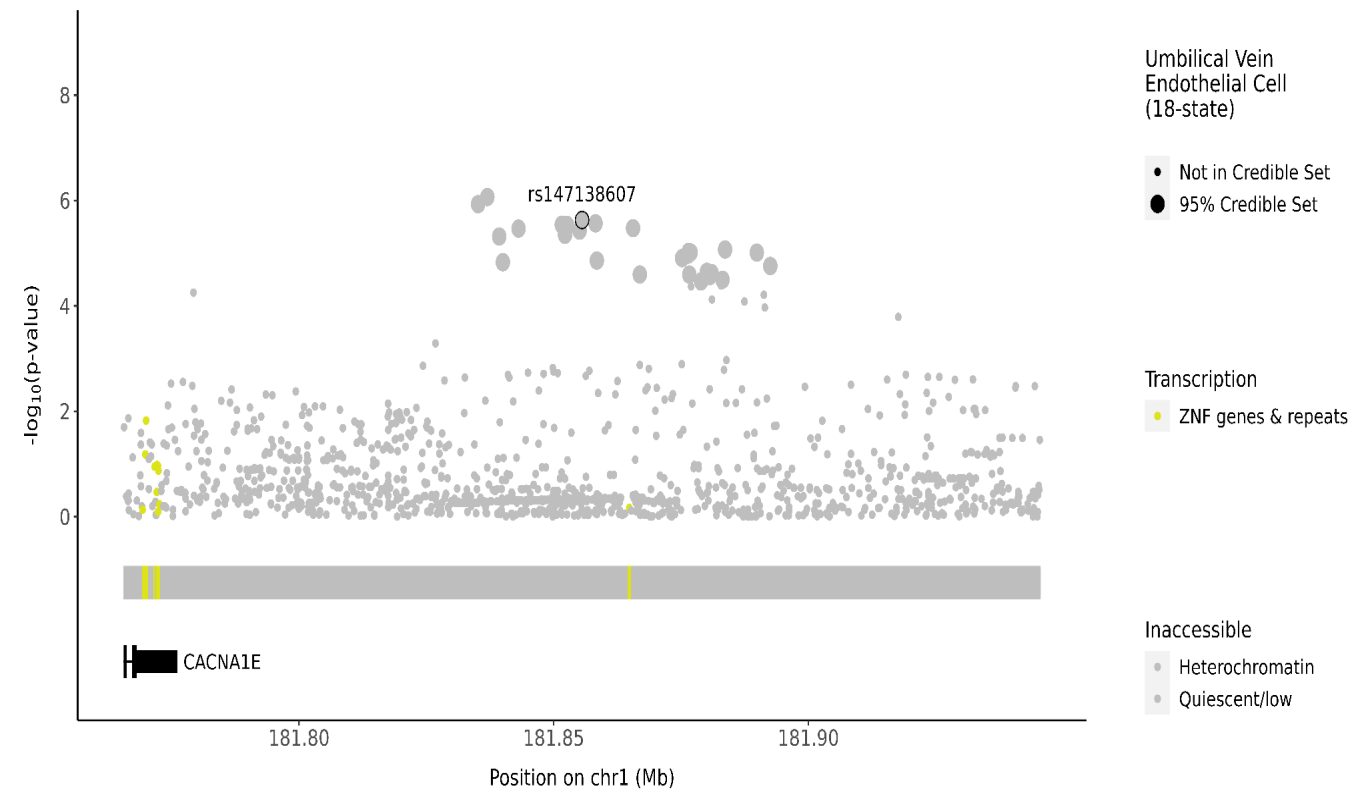

B

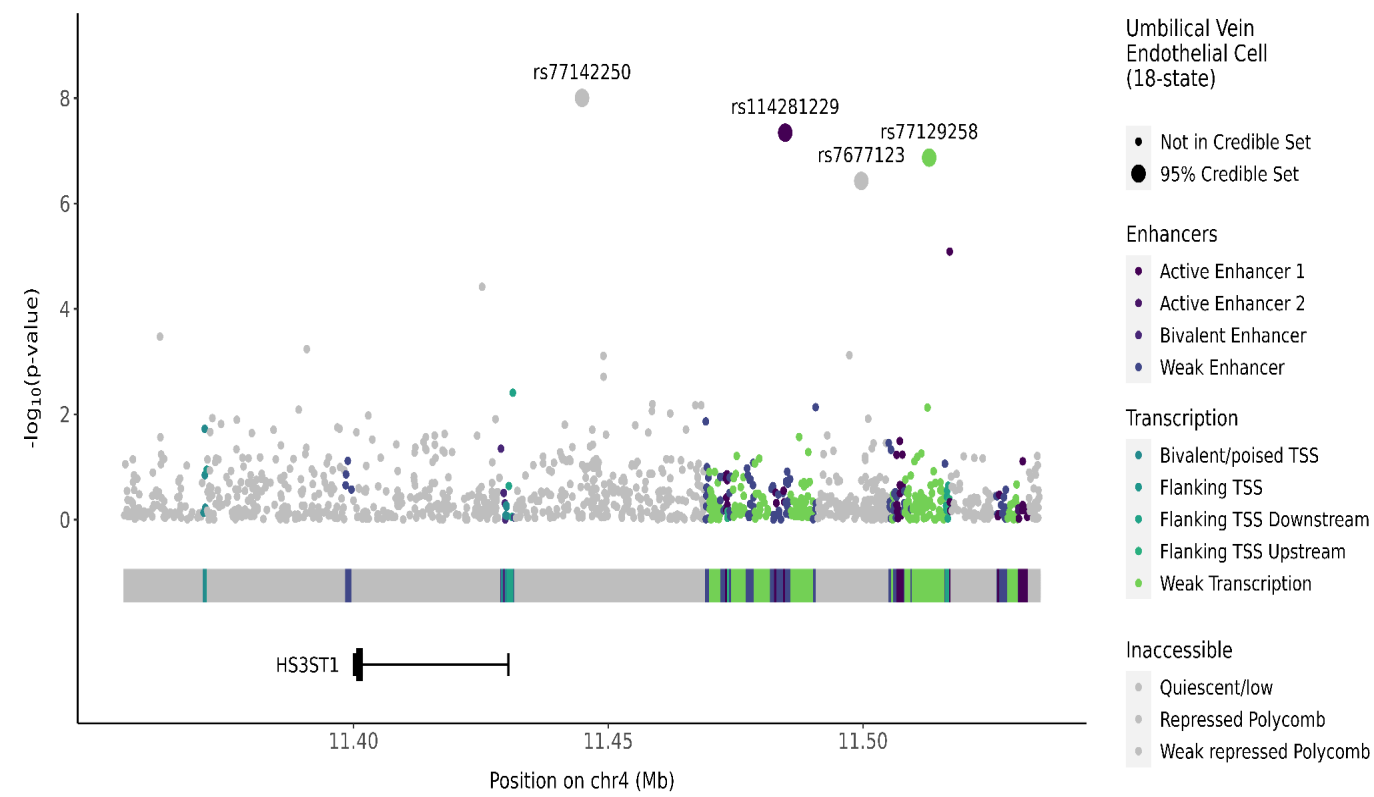

C

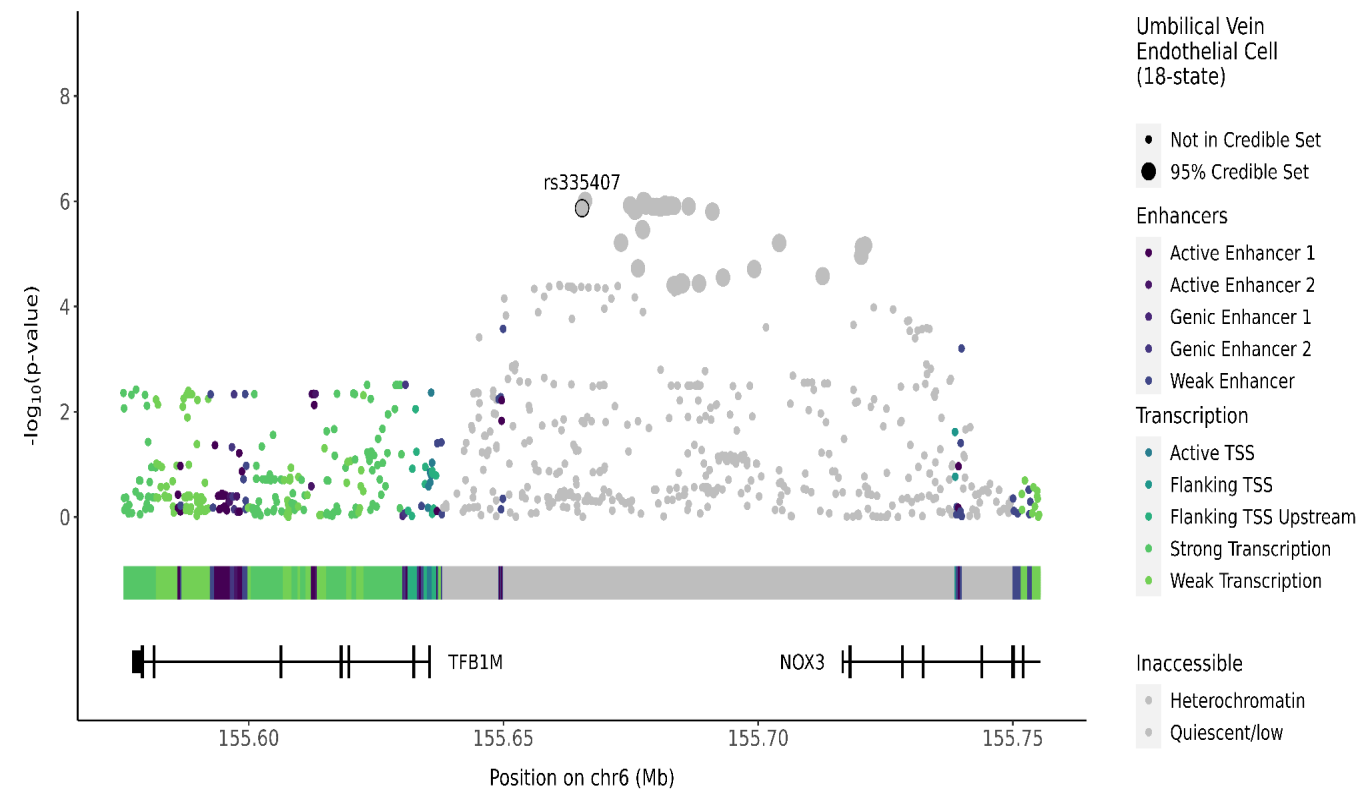

Supplement: Supplementary file 2 [file 1]
